# Supplementary material
Source: publisher figshare collection journal article supplement (https://tandf.figshare.com/ndownloader/files/15374468)
Supplement: Supplementary file 1 [file 15374468]

**Sulfated copper oxide catalyzed one-pot synthesis of**

***N*-fused benzimidazolo/benzothiazolo pyrimidines**

Sankaranarayanan Jayashree and Kalegowda Shivashankar*

*P.G. Department of Chemistry, Central College Campus, Bangalore University,*

*Bangalore - 560 001, Karnataka, India.*

***Corresponding author:** *E-mail address*: [shivashankark@gmail.com](mailto:shivashankark@gmail.com) (K. Shivashankar)

**Synthetic Procedure for various *N*-fused benzimidazolo/benzthiazolo pyrimidines**

***Synthetic procedure for the preparation of 2,4-Diphenylbenzo[4,5]imidazo[1,2-a]pyrimidine (4a)***

A mixture of benzaldehyde (1 mmol), 2-aminobenzimidazole (1 mmol) and acetonitrile (5 ml) were taken in a sealed tube and warmed for 5 minutes. Phenyl acetylene (1.1 mmol) and sulfated copper oxide (prepared according to literature 62) (10 mol %) were added to the reaction mixture and stirred for another 10 minutes under nitrogen atmosphere at room temperature and the reaction mixture was refluxed at 800 C. Upon completion (3 h) of the reaction, as indicated by TLC, the mixture was washed with ethyl acetate and the catalyst was separated by filtration. The solvent was evaporated under reduced pressure to get the crude product. The crude product was purified by column chromatography on silica gel (ethyl acetate/hexane) and afforded the 2,4-Diphenylbenzo[4,5]imidazo[1,2-*a*]pyrimidine.

***Synthetic procedure for the preparation of 2-(4-Nitrophenyl)-4-phenylbenzo[4,5]imidazo[1,2-a]-pyrimidine (4b)***

A mixture of 4-nitrobenzaldehyde (1 mmol), 2-aminobenzimidazole (1 mmol) and acetonitrile (5 ml) were taken in a sealed tube and warmed for 5 minutes. Phenyl acetylene (1.1 mmol) and sulfated copper oxide (prepared according to literature 62) (10 mol %) were added to the reaction mixture and stirred for another 10 minutes under nitrogen atmosphere at room temperature and the reaction mixture was refluxed at 800 C. Upon completion (3 h) of the reaction, as indicated by TLC, the mixture was washed with ethyl acetate and the catalyst was separated by filtration. The solvent was evaporated under reduced pressure to get the crude product. The crude product was purified by column chromatography on silica gel (ethyl acetate/hexane) and afforded the 2-(4-Nitrophenyl)-4-phenylbenzo[4,5]imidazo[1,2-*a*]-pyrimidine.

***Synthetic procedure for the preparation of 4-(4-Phenylbenzo[4,5]imidazo[1,2-a]pyrimidin-2-yl)-benzonitrile (4c)***

A mixture of 4-cyanobenzaldehyde (1 mmol), 2-aminobenzimidazole (1 mmol) and acetonitrile (5 ml) were taken in a sealed tube and warmed for 5 minutes. Phenyl acetylene (1.1 mmol) and sulfated copper oxide (prepared according to literature 62) (10 mol %) were added to the reaction mixture and stirred for another 10 minutes under nitrogen atmosphere at room temperature and the reaction mixture was refluxed at 800 C. Upon completion (3 h) of the reaction, as indicated by TLC, the mixture was washed with ethyl acetate and the catalyst was separated by filtration. The solvent was evaporated under reduced pressure to get the crude product. The crude product was purified by column chromatography on silica gel (ethyl acetate/hexane) and afforded 4-(4-Phenylbenzo[4,5]imidazo[1,2-*a*]pyrimidin-2-yl)-benzonitrile.

***Synthetic procedure for the preparation of 2-(4-Bromophenyl)-4-phenylbenzo[4,5]imidazo[1,2-a]-pyrimidine (4d)***

A mixture of 4-bromobenzaldehyde (1 mmol), 2-aminobenzimidazole (1 mmol) and acetonitrile (5 ml) were taken in a sealed tube and warmed for 5 minutes. Phenyl acetylene (1.1 mmol) and sulfated copper oxide (prepared according to literature 62) (10 mol %) were added to the reaction mixture and stirred for another 10 minutes under nitrogen atmosphere at room temperature and the reaction mixture was refluxed at 800 C. Upon completion (3 h) of the reaction, as indicated by TLC, the mixture was washed with ethyl acetate and the catalyst was separated by filtration. The solvent was evaporated under reduced pressure to get the crude product. The crude product was purified by column chromatography on silica gel (ethyl acetate/hexane) and afforded 2-(4-Bromophenyl)-4-phenylbenzo[4,5]imidazo[1,2-*a*]-pyrimidine.

***Synthetic procedure for the preparation of 2-(4-Chlorophenyl)-4-phenylbenzo[4,5]imidazo[1,2-a]-pyrimidine (4e)***

A mixture of 4-chlorobenzaldehyde (1 mmol), 2-aminobenzimidazole (1 mmol) and acetonitrile (5 ml) were taken in a sealed tube and warmed for 5 minutes. Phenyl acetylene (1.1 mmol) and sulfated copper oxide (prepared according to literature 62) (10 mol %) were added to the reaction mixture and stirred for another 10 minutes under nitrogen atmosphere at room temperature and the reaction mixture was refluxed at 800 C. Upon completion (3 h) of the reaction, as indicated by TLC, the mixture was washed with ethyl acetate and the catalyst was separated by filtration. The solvent was evaporated under reduced pressure to get the crude product. The crude product was purified by column chromatography on silica gel (ethyl acetate/hexane) and afforded 2-(4-Chlorophenyl)-4-phenylbenzo[4,5]imidazo[1,2-*a*]-pyrimidine.

***Synthetic procedure for the preparation of 2-(2-nitrophenyl)-4-phenylbenzo[4,5]imidazo[1,2-a]pyrimidine (4f)***

A mixture of 2-nitrobenzaldehyde (1 mmol), 2-aminobenzimidazole (1 mmol) and acetonitrile (5 ml) were taken in a sealed tube and warmed for 5 minutes. Phenyl acetylene (1.1 mmol) and sulfated copper oxide (prepared according to literature 62) (10 mol %) were added to the reaction mixture and stirred for another 10 minutes under nitrogen atmosphere at room temperature and the reaction mixture was refluxed at 800 C. Upon completion (3 h) of the reaction, as indicated by TLC, the mixture was washed with ethyl acetate and the catalyst was separated by filtration. The solvent was evaporated under reduced pressure to get the crude product. The crude product was purified by column chromatography on silica gel (ethyl acetate/hexane) and afforded 2-(2-nitrophenyl)-4-phenylbenzo[4,5]imidazo[1,2-*a*]pyrimidine.

.

***Synthetic procedure for the preparation of 2-(2,6-Dichlorophenyl)-4-phenylbenzo[4,5]imidazo[1,2-a]-pyrimidine (4g)***

A mixture of 2,6-dichlorobenzaldehyde (1 mmol), 2-aminobenzimidazole (1 mmol) and acetonitrile (5 ml) were taken in a sealed tube and warmed for 5 minutes. Phenyl acetylene (1.1 mmol) and sulfated copper oxide (prepared according to literature 62) (10 mol %) were added to the reaction mixture and stirred for another 10 minutes under nitrogen atmosphere at room temperature and the reaction mixture was refluxed at 800 C. Upon completion (3 h) of the reaction, as indicated by TLC, the mixture was washed with ethyl acetate and the catalyst was separated by filtration. The solvent was evaporated under reduced pressure to get the crude product. The crude product was purified by column chromatography on silica gel (ethyl acetate/hexane) and afforded 2-(2,6-Dichlorophenyl)-4-phenylbenzo[4,5]imidazo[1,2-*a*]-pyrimidine.

***Synthetic procedure for the preparation of 4-phenyl-2-(p-tolyl)benzo[4,5]imidazo[1,2-a]pyrimidine (4h)***

A mixture of 4-methylbenzaldehyde (1 mmol), 2-aminobenzimidazole (1 mmol) and acetonitrile (5 ml) were taken in a sealed tube and warmed for 5 minutes. Phenyl acetylene (1.1 mmol) and sulfated copper oxide (prepared according to literature 62) (10 mol %) were added to the reaction mixture and stirred for another 10 minutes under nitrogen atmosphere at room temperature and the reaction mixture was refluxed at 800 C. Upon completion (3 h) of the reaction, as indicated by TLC, the mixture was washed with ethyl acetate and the catalyst was separated by filtration. The solvent was evaporated under reduced pressure to get the crude product. The crude product was purified by column chromatography on silica gel (ethyl acetate/hexane) and afforded 4-phenyl-2-(*p*-tolyl)benzo[4,5]imidazo[1,2-*a*]pyrimidine.

***Synthetic procedure for the preparation of 4-phenyl-2-(o-tolyl)benzo[4,5]imidazo[1,2-a]pyrimidine (4i)***

A mixture of 2-methylbenzaldehyde (1 mmol), 2-aminobenzimidazole (1 mmol) and acetonitrile (5 ml) were taken in a sealed tube and warmed for 5 minutes. Phenyl acetylene (1.1 mmol) and sulfated copper oxide (prepared according to literature 62) (10 mol %) were added to the reaction mixture and stirred for another 10 minutes under nitrogen atmosphere at room temperature and the reaction mixture was refluxed at 800 C. Upon completion (3 h) of the reaction, as indicated by TLC, the mixture was washed with ethyl acetate and the catalyst was separated by filtration. The solvent was evaporated under reduced pressure to get the crude product. The crude product was purified by column chromatography on silica gel (ethyl acetate/hexane) and afforded 4-phenyl-2-(*o*-tolyl)benzo[4,5]imidazo[1,2-*a*]pyrimidine.

***Synthetic procedure for the preparation of 4-phenyl-2-(3,4,5-trimethoxyphenyl)benzo[4,5]imidazo[1,2-a]pyrimidine (4j)***

A mixture of 3,4,5-methoxybenzaldehyde (1 mmol), 2-aminobenzimidazole (1 mmol) and acetonitrile (5 ml) were taken in a sealed tube and warmed for 5 minutes. Phenyl acetylene (1.1 mmol) and sulfated copper oxide (prepared according to literature 62) (10 mol %) were added to the reaction mixture and stirred for another 10 minutes under nitrogen atmosphere at room temperature and the reaction mixture was refluxed at 800 C. Upon completion (3 h) of the reaction, as indicated by TLC, the mixture was washed with ethyl acetate and the catalyst was separated by filtration. The solvent was evaporated under reduced pressure to get the crude product. The crude product was purified by column chromatography on silica gel (ethyl acetate/hexane) and afforded 4-phenyl-2-(3,4,5-trimethoxyphenyl)benzo[4,5]imidazo[1,2-*a*]pyrimidine.

***Synthetic procedure for the preparation of 2,4-Diphenyl-2H-benzo[4,5]thiazolo[3,2-a]-pyrimidine (5a)***

A mixture of benzaldehyde (1 mmol), 2-aminobenzothiazole (1 mmol) and acetonitrile (5 ml) were taken in a sealed tube and warmed for 5 minutes. Phenyl acetylene (1.1 mmol) and sulfated copper oxide (prepared according to literature 62) (10 mol %) were added to the reaction mixture and stirred for another 10 minutes under nitrogen atmosphere at room temperature and the reaction mixture was refluxed at 800 C. Upon completion (3 h) of the reaction, as indicated by TLC, the mixture was washed with ethyl acetate and the catalyst was separated by filtration. The solvent was evaporated under reduced pressure to get the crude product. The crude product was purified by column chromatography on silica gel (ethyl acetate/hexane) and afforded 2,4-Diphenyl-2*H*-benzo[4,5]thiazolo[3,2-*a*]-pyrimidine.

***Synthetic procedure for the preparation of 2-(4-Nitrophenyl)-4-phenyl-2H-benzo[4,5]thiazolo[3,2-a]-pyrimidine (5b)***

A mixture of 4-nitrobenzaldehyde (1 mmol), 2-aminobenzothiazole (1 mmol) and acetonitrile (5 ml) were taken in a sealed tube and warmed for 5 minutes. Phenyl acetylene (1.1 mmol) and sulfated copper oxide (prepared according to literature 62) (10 mol %) were added to the reaction mixture and stirred for another 10 minutes under nitrogen atmosphere at room temperature and the reaction mixture was refluxed at 800 C. Upon completion (3 h) of the reaction, as indicated by TLC, the mixture was washed with ethyl acetate and the catalyst was separated by filtration. The solvent was evaporated under reduced pressure to get the crude product. The crude product was purified by column chromatography on silica gel (ethyl acetate/hexane) and afforded 2-(4-Nitrophenyl)-4-phenyl-2*H*-benzo[4,5]thiazolo[3,2-*a*]-pyrimidine.

***Synthetic procedure for the preparation of 4-(4-Phenyl)-2H-benzo[4,5]thiazolo[3,2-a]-pyrimidin-2-yl)benzonitrile (5c)***

A mixture of 4-cyanobenzaldehyde (1 mmol), 2-aminobenzothiazole (1 mmol) and acetonitrile (5 ml) were taken in a sealed tube and warmed for 5 minutes. Phenyl acetylene (1.1 mmol) and sulfated copper oxide (prepared according to literature 62) (10 mol %) were added to the reaction mixture and stirred for another 10 minutes under nitrogen atmosphere at room temperature and the reaction mixture was refluxed at 800 C. Upon completion (3 h) of the reaction, as indicated by TLC, the mixture was washed with ethyl acetate and the catalyst was separated by filtration. The solvent was evaporated under reduced pressure to get the crude product. The crude product was purified by column chromatography on silica gel (ethyl acetate/hexane) and afforded 4-(4-Phenyl)-2*H*-benzo[4,5]thiazolo[3,2-*a*]-pyrimidin-2-yl)benzonitrile.

***Synthetic procedure for the preparation of 2-(4-Bromophenyl)-4-phenyl-2H-benzo[4,5]thiazolo[3,2-a]-pyrimidine (5d)***

A mixture of 4-bromobenzaldehyde (1 mmol), 2-aminobenzothiazole (1 mmol) and acetonitrile (5 ml) were taken in a sealed tube and warmed for 5 minutes. Phenyl acetylene (1.1 mmol) and sulfated copper oxide (prepared according to literature 62) (10 mol %) were added to the reaction mixture and stirred for another 10 minutes under nitrogen atmosphere at room temperature and the reaction mixture was refluxed at 800 C. Upon completion (3 h) of the reaction, as indicated by TLC, the mixture was washed with ethyl acetate and the catalyst was separated by filtration. The solvent was evaporated under reduced pressure to get the crude product. The crude product was purified by column chromatography on silica gel (ethyl acetate/hexane) and afforded 2-(4-Bromophenyl)-4-phenyl-2*H*-benzo[4,5]thiazolo[3,2-*a*]-pyrimidine.

***Synthetic procedure for the preparation of 2-(4-Chlorophenyl)-4-phenyl-2H-benzo[4,5]thiazolo[3,2-a]-pyrimidine (5e)***

A mixture of 4-chlorobenzaldehyde (1 mmol), 2-aminobenzothiazole (1 mmol) and acetonitrile (5 ml) were taken in a sealed tube and warmed for 5 minutes. Phenyl acetylene (1.1 mmol) and sulfated copper oxide (prepared according to literature 62) (10 mol %) were added to the reaction mixture and stirred for another 10 minutes under nitrogen atmosphere at room temperature and the reaction mixture was refluxed at 800 C. Upon completion (3 h) of the reaction, as indicated by TLC, the mixture was washed with ethyl acetate and the catalyst was separated by filtration. The solvent was evaporated under reduced pressure to get the crude product. The crude product was purified by column chromatography on silica gel (ethyl acetate/hexane) and afforded 2-(4-Chlorophenyl)-4-phenyl-2*H*-benzo[4,5]thiazolo[3,2-a]-pyrimidine.

***Synthetic procedure for the preparation of 2-(2-nitrophenyl)-4-phenyl-2H-benzo[4,5]thiazolo[3,2-a]-pyrimidine (5f)***

A mixture of 2-nitrobenzaldehyde (1 mmol), 2-aminobenzothiazole (1 mmol) and acetonitrile (5 ml) were taken in a sealed tube and warmed for 5 minutes. Phenyl acetylene (1.1 mmol) and sulfated copper oxide (prepared according to literature 62) (10 mol %) were added to the reaction mixture and stirred for another 10 minutes under nitrogen atmosphere at room temperature and the reaction mixture was refluxed at 800 C. Upon completion (3 h) of the reaction, as indicated by TLC, the mixture was washed with ethyl acetate and the catalyst was separated by filtration. The solvent was evaporated under reduced pressure to get the crude product. The crude product was purified by column chromatography on silica gel (ethyl acetate/hexane) and afforded 2-(2-nitrophenyl)-4-phenyl-2*H*-benzo[4,5]thiazolo[3,2-*a*]-pyrimidine.

.

***Synthetic procedure for the preparation of 2-(2,6-dichlorophenyl)-4-phenyl-2H-benzo[4,5]thiazolo[3,2-a]-pyrimidine (5g)***

A mixture of 2,6-dichlorobenzaldehyde (1 mmol), 2-aminobenzothiazole (1 mmol) and acetonitrile (5 ml) were taken in a sealed tube and warmed for 5 minutes. Phenyl acetylene (1.1 mmol) and sulfated copper oxide (prepared according to literature 62) (10 mol %) were added to the reaction mixture and stirred for another 10 minutes under nitrogen atmosphere at room temperature and the reaction mixture was refluxed at 800 C. Upon completion (3 h) of the reaction, as indicated by TLC, the mixture was washed with ethyl acetate and the catalyst was separated by filtration. The solvent was evaporated under reduced pressure to get the crude product. The crude product was purified by column chromatography on silica gel (ethyl acetate/hexane) and afforded 2-(2,6-dichlorophenyl)-4-phenyl-2*H*-benzo[4,5]thiazolo[3,2-*a*]-pyrimidine.

***Synthetic procedure for the preparation of 4-phenyl-2-(p-tolyl)-2H-benzo[4,5]thiazolo[3,2-a]pyrimidine (5h)***

A mixture of 4-methylbenzaldehyde (1 mmol), 2-aminobenzothiazole (1 mmol) and acetonitrile (5 ml) were taken in a sealed tube and warmed for 5 minutes. Phenyl acetylene (1.1 mmol) and sulfated copper oxide (prepared according to literature 62) (10 mol %) were added to the reaction mixture and stirred for another 10 minutes under nitrogen atmosphere at room temperature and the reaction mixture was refluxed at 800 C. Upon completion (3 h) of the reaction, as indicated by TLC, the mixture was washed with ethyl acetate and the catalyst was separated by filtration. The solvent was evaporated under reduced pressure to get the crude product. The crude product was purified by column chromatography on silica gel (ethyl acetate/hexane) and afforded 4-phenyl-2-(*p*-tolyl)-2*H*-benzo[4,5]thiazolo[3,2-*a*]pyrimidine.

***Synthetic procedure for the preparation of 4-phenyl-2-(o-tolyl)-2H-benzo[4,5]thiazolo[3,2-a]pyrimidine (5i)***

A mixture of 2-methylbenzaldehyde (1 mmol), 2-aminobenzothiazole (1 mmol) and acetonitrile (5 ml) were taken in a sealed tube and warmed for 5 minutes. Phenyl acetylene (1.1 mmol) and sulfated copper oxide (prepared according to literature 62) (10 mol %) were added to the reaction mixture and stirred for another 10 minutes under nitrogen atmosphere at room temperature and the reaction mixture was refluxed at 800 C. Upon completion (3 h) of the reaction, as indicated by TLC, the mixture was washed with ethyl acetate and the catalyst was separated by filtration. The solvent was evaporated under reduced pressure to get the crude product. The crude product was purified by column chromatography on silica gel (ethyl acetate/hexane) and afforded 4-phenyl-2-(*o*-tolyl)-2*H*-benzo[4,5]thiazolo[3,2-*a*]pyrimidine.

***Synthetic procedure for the preparation of 4-phenyl-2-(3,4,5-trimethoxyphenyl)-2H-benzo[4,5]thiazolo[3,2-a]-pyrimidine (5j)***

A mixture of 3,4,5-trimethoxybenzaldehyde (1 mmol), 2-aminobenzothiazole (1 mmol) and acetonitrile (5 ml) were taken in a sealed tube and warmed for 5 minutes. Phenyl acetylene (1.1 mmol) and sulfated copper oxide (prepared according to literature 62) (10 mol %) were added to the reaction mixture and stirred for another 10 minutes under nitrogen atmosphere at room temperature and the reaction mixture was refluxed at 800 C. Upon completion (3 h) of the reaction, as indicated by TLC, the mixture was washed with ethyl acetate and the catalyst was separated by filtration. The solvent was evaporated under reduced pressure to get the crude product. The crude product was purified by column chromatography on silica gel (ethyl acetate/hexane) and afforded 4-phenyl-2-(3,4,5-trimethoxyphenyl)-2*H*-benzo[4,5]thiazolo[3,2-*a*]-pyrimidine.

**SPECTRAL DETAILS**

***2,4-Diphenylbenzo[4,5]imidazo[1,2-a]pyrimidine (4a)*** *(Lit. 31)*

Yellow solid; 1H NMR (400 MHz, DMSO-*d6*): δ 8.27-7.78 (m, 5H, Ar-H), 7.57 (s, 1H, CH), 7.34-6.81 (m, 9H, Ar-H) ppm; 13C NMR (100 MHz, DMSO*-d6*): δ 162.6, 160.0, 150.1, 142.2, 138.8, 135.2, 133.3, 129.8, 128.8, 127.9, 123.7, 117.1, 113.2, 103.6 ppm; Anal. Calcd for C22H15N3: C, 82.22; H, 4.70; N, 13.08. Found: C, 82.20; H, 4.67; N, 13.06.

***2-(4-Nitrophenyl)-4-phenylbenzo[4,5]imidazo[1,2-a]-pyrimidine (4b)*** *(Lit. 31)*

Yellow solid; 1H NMR(400 MHz, DMSO*-d6*): δ 8.56-7.73 (m, 8H, Ar-H), 7.56 (s, 1H, CH), 7.34 -6.81 (m, 5H, Ar-H) ppm; 13C NMR (100 MHz, DMSO*-d6*): δ 162.0, 160.7, 150.6, 147.4, 142.1, 141.5, 139.8, 135.8, 129.7, 128.6, 127.8, 125.4, 124.1, 123.6, 118.3, 113.2, 103.9 ppm; Anal. Calcd for C22H14N4O2: C, 72.12; H, 3.85; N, 15.29. Found: C, 72.09; H, 3.83; N, 15.27.

***4-(4-Phenylbenzo[4,5]imidazo[1,2-a]pyrimidin-2-yl)-benzonitrile (4c)*** *(Lit. 31)*

Yellow solid; 1H NMR(400 MHz, DMSO*-d6*): δ 8.22-7.72 (m, 8H, Ar-H), 7.52 (s, 1H, CH), 7.33-6.81 (m, 5H, Ar-H) ppm; 13C NMR (100 MHz, DMSO*-d6*): δ 162.5, 160.1, 150.1, 142.6, 139.2, 135.9, 132.1, 129.7, 128.0, 127.7, 126.6, 123.5, 119.4, 118.4, 113.7, 112.8, 103.0 ppm; Anal. Calcd for C23H14N4: C, 79.75; H, 4.07; N, 16.17. Found: C, 79.71; H, 4.03; N, 16.13.

***2-(4-Bromophenyl)-4-phenylbenzo[4,5]imidazo[1,2-a]-pyrimidine (4d)*** *(Lit. 31)*

Yellow solid; 1H NMR(400 MHz, DMSO*-d6*): δ 8.12-7.70 (m, 8H, Ar-H), 7.51 (s, 1H, CH), 7.37-6.89 (m, 5H, Ar-H) ppm; 13C NMR (100 MHz, DMSO*-d6*): δ 162.4, 160.1, 151.4, 143.6, 139.6, 136.3, 135.8, 132.5, 129.0, 128.8, 127.3, 126.0, 123.6, 122.3, 119.5, 113.4, 104.0 ppm; Anal. Calcd for C22H14BrN3: C, 66.01; H, 3.53; N, 10.50. Found: C, 65.97; H, 3.51; N, 10.48.

***2-(4-Chlorophenyl)-4-phenylbenzo[4,5]imidazo[1,2-a]-pyrimidine (4e)*** *(Lit. 31)*

Yellow solid; 1H NMR(400 MHz, DMSO*-d6*): δ 8.12-7.72 (m, 8H, Ar-H), 7.54 (s, 1H), 7.35-6.94 (m, 5H, Ar-H) ppm; 13C NMR (100 MHz, DMSO*-d6*): δ 162.1, 160.5, 151.1, 143.4, 139.4, 134.2, 133.5, 132.7, 130.4, 129.8, 128.1, 127.2, 126.9, 123.8, 120.8, 114.1, 104.2 ppm; Anal. Calcd for C22H14ClN3: C, 74.26; H, 3.97; N, 11.81. Found: C, 74.24; H, 3.95; N, 11.78.

***2-(2-Nitrophenyl)-4-phenylbenzo[4,5]imidazo[1,2-a]pyrimidine (4f)*** *(Lit. 32)*

Yellow solid; 1H NMR (400 MHz, DMSO*-d6*): δ 8.20-7.77 (m, 6H, Ar-H), 7.51 (s, 1H, CH), 7.39-6.95 (m, 7H, Ar-H) ppm; 13C NMR (100 MHz, DMSO*-d6*): δ 163.3, 161.1, 150.6, 149.9, 143.3, 140.2, 135.1, 133.7, 132.2, 130.8, 129.7, 128.3, 127.6, 123.6, 119.6, 113.9, 105.8 ppm; Anal. Calcd for C22H14N4O2: C, 74.26; H, 3.97; N, 11.81. Found: C, 74.24; H, 3.95; N, 11.78.

***2-(2,6-Dichlorophenyl)-4-phenylbenzo[4,5]imidazo[1,2-a]-pyrimidine (4g )*** *(Lit. 31)*

Yellow solid; 1H NMR(400 MHz, DMSO*-d6*): δ 8.12-7.67 (m, 5H, Ar-H), 7.53 (s, 1H, CH), 7.49-6.93 (m, 7H, Ar-H) ppm; 13C NMR (100 MHz, DMSO*-d6*): δ 163.1, 161.3, 149.2, 143.7, 140.2, 135.0, 133.4, 131.2, 130.2, 129.4, 128.4, 127.0, 126.7, 123.2, 119.1, 113.5, 105.3 ppm; Anal. Calcd for C22H13Cl2N3: C, 67.71; H, 3.36; N, 10.77. Found: C, 67.70; H, 3.33; N, 10.74.

***4-Phenyl-2-(p-tolyl)benzo[4,5]imidazo[1,2-a]pyrimidine (4h)*** *(Lit. 32)*

Yellow solid; 1H NMR (400 MHz, DMSO*-d6*): δ 8.27-7.78 (m, 4H, Ar-H), 7.57 (s, 1H, CH), 7.49-6.82 (m, 9H, Ar-H), 2.38 (s, 3H, CH3) ppm; 13C NMR (100 MHz, DMSO*-d6*): δ 162.9, 160.0, 150.7, 143.2 139.6, 135.4, 132.1, 131.4, 130.4, 129.9, 128.1, 127.8, 124.6, 123.1, 119.8, 112.1, 105.1, 21.7 ppm; Anal. Calcd for C23H17N3: C, 82.36; H, 5.11; N, 12.53. Found: 82.34; H, 5.09; N, 12.52.

***4-Phenyl-2-(o-tolyl)benzo[4,5]imidazo[1,2-a]pyrimidine (4i)***

Yellow solid; 1H NMR (400 MHz, DMSO*-d6*): δ 8.26-7.71 (m, 5H, Ar-H), 7.52 (s, 1H, CH), 7.48-6.94 (m, 8H, Ar-H), 2.35 (s, 3H) ppm; 13C NMR (100 MHz, DMSO*-d6*): δ 163.3, 161.1, 150.0, 143.7, 140.7, 137.0, 135.0, 131.5, 130.4, 129.4, 128.8, 127.6, 126.2, 123.6, 122.2, 119.0, 117.6, 105.1, 19.2 ppm; Anal. Calcd for C23H17N3: C, 82.36; H, 5.11; N, 12.53. Found: 82.34; H, 5.10; N, 12.51; HRMS:*m/z* Calculated: 335.1422, Found: 336.1507 [M + H] +

***4-Phenyl-2-(3,4,5-trimethoxyphenyl)benzo[4,5]imidazo[1,2-a]pyrimidine (4j)*** *(Lit. 32)*

Yellow solid; 1H NMR (400 MHz, DMSO*-d6*): δ 8.23-7.77 (m, 4H, Ar-H), 7.53 (s, 1H, CH), 7.37-6.51 (m, 7H, Ar-H), 3.89 (s, 9H, 3-OCH3) ppm; 13C NMR (100 MHz, DMSO*-d6*): δ 162.3, 160.5, 153.4, 150.0, 143.5, 140.2, 139.0, 135.5, 129.6, 128.1, 127.0, 126.1, 123.4, 119.0, 113.8, 105.0, 100.1, 61.2, 56.2 ppm; Anal. Calcd for C25H21N3O3: C, 72.98; H, 5.14; N, 10.21; O, 11.67. Found: C, 72.96; H, 5.11; N, 10.19; O, 11.66.

***2,4-Diphenyl-2H- benzo[4,5]thiazolo[3,2-a]-pyrimidine (5a)***

Yellow solid; 1H NMR (400 MHz, DMSO*-d6*): δ 7.94-6.92 (m, 14H, Ar-H), 6.01 (d, 8.1 Hz, 1H), 5.54 (d, J = 7.6 Hz, 1H) ppm; 13C NMR (100 MHz, DMSO*-d6*): δ 160.7, 145.8, 143.2, 141.8, 134.2, 129.9, 128.6, 127.5, 126.0, 125.9, 124.7, 123.8, 122.0, 121.8, 119.4, 101.8, 60.8 ppm; Anal. Calcd for C22H16N2S: C, 77.62; H, 4.74; N, 8.23: S, 9.42. Found: C, 77.60; H, 4.72; N, 8.21: S, 9.38; HRMS:*m/z* Calculated: 340.1034, Found: 341.1119 [M + H] +

***2-(4-Nitrophenyl)-4-phenyl-2H-benzo[4,5]thiazolo[3,2-a]-pyrimidine (5b)***

Yellow solid; 1H NMR (400 MHz, DMSO*-d6*): δ 8.12-6.91 (m, 13H, Ar-H), 6.02 (d, 8.4 Hz, 1H), 5.53 (d, J = 8.1 Hz, 1H) ppm; 13C NMR (100 MHz, DMSO*-d6*): δ 161.0, 147.1, 146.8, 145.5, 143.9, 134.3, 130.2, 129.2, 128.2, 127.9, 126.6, 124.4, 123.2, 122.5, 121.9, 119.5, 100.2, 60.0 ppm; Anal. Calcd for C22H15N3O2S: C, 68.55; H, 3.92; N, 10.90; S, 8.32; Found: 68.53; H, 3.90; N, 10.87; S, 8.29; HRMS:*m/z* Calculated: 385.0885, Found: 386.0968 [M + H] +

***4-(4-Phenyl)-2H-benzo[4,5]thiazolo[3,2-a]-pyrimidin-2-yl)benzonitrile (5c)***

Yellow solid; 1H NMR(400 MHz, DMSO*-d6*): δ 7.93-6.92 (m, 13H, Ar-H), 6.03 (d, 8.1 Hz, 1H), 5.54 (d, J = 8.1 Hz, 1H) ppm; 13C NMR (100 MHz, DMSO*-d6*): δ 160.7, 146.0, 145.9, 143.1, 134.2, 132.4, 129.5, 128.7, 127.4, 126.1, 125.8, 124.7, 122.1, 121.9, 119.7, 117.8, 110.4, 101.5, 60.7 ppm; Anal. Calcd for C23H15N3S: C, 75.59; H, 4.14; N, 11.50; S, 8.77; Found: C, 75.56; H, 4.11; N, 11.48; S, 8.75; HRMS:*m/z* Calculated: 365.0987, Found: 366.1069 [M + H] +

***2-(4-Bromophenyl)-4-phenyl-2H-benzo[4,5]thiazolo[3,2-a]-pyrimidine (5d)***

Yellow solid; 1H NMR (400 MHz, DMSO*-d6*): δ 7.94-6.91 (m, 13H, Ar-H), 6.04 (d, 8.1 Hz, 1H), 5.53 (d, J = 8.1 Hz, 1H) ppm; 13C NMR (100 MHz, DMSO*-d6*): δ 160.8, 145.0, 143.1, 141.3, 134.3, 132.6, 131.5, 129.4, 128.8, 127.8, 126.1, 124.7, 122.2, 121.6, 120.0, 119.8, 101.4, 60.8 ppm; Anal. Calcd for C22H15BrN2S: C, 63.01; H, 3.61; N, 6.68; S, 7.65; Found: C, 62.98; H, 3.59; N, 6.66; S, 7.63; HRMS:*m/z* Calculated: 418.0139, Found: 419.0221 [M + H] +

***2-(4-Chlorophenyl)-4-phenyl-2H-benzo[4,5]thiazolo[3,2-a]-pyrimidine (5e)*** *(Lit. 31)*

Yellow solid; 1H NMR (400 MHz, DMSO*-d6*): δ 7.95-6.93 (m, 13H, Ar-H), 6.03 (d, 8.1 Hz, 1H), 5.54 (d, J = 8.1 Hz, 1H) ppm; 13C NMR (100 MHz, DMSO*-d6*): δ 160.7, 145.6, 143.0, 141.2, 135.9, 132.3, 131.6, 130.1, 129.3, 128.4, 127.9, 126.0, 124.2, 122.1, 121.9, 119.6, 101.3, 60.1 ppm; Anal. Calcd for C22H15ClN2S: C, 70.48; H, 4.03 N, 7.47. Found: C, 70.45; H, 4.01 N, 7.45.

***2-(2-Nitrophenyl)-4-phenyl-2H-benzo[4,5]thiazolo[3,2-a]-pyrimidine (5f)***

Yellow solid; 1H NMR (400 MHz, DMSO*-d6*): δ 8.13-6.91 (m, 13H, Ar-H), 6.03 (d, 8.1 Hz, 1H), 5.53 (d, J = 8.4 Hz, 1H) ppm; 13C NMR (100 MHz, DMSO*-d6*): δ 160.2, 145.5, 143.1, 140.6, 136.4, 135.3, 134.2, 129.1, 128.8, 127.2, 126.7, 125.4, 124.8, 123.6, 122.7, 121.2, 119.2, 101.6, 50.9 ppm; Anal. Calcd for C22H15N3O2S: C, 68.55; H, 3.92; N, 10.90; S, 8.32; Found: C, 68.53; H, 3.90; N, 10.87; S, 8.30; HRMS:*m/z* Calculated: 385.0885, Found: 386.0969 [M + H] +

***2-(2,6-Dichlorophenyl)-4-phenyl-2H-benzo[4,5]thiazolo[3,2-a]-pyrimidine (5g)***

Yellow solid; 1H NMR (400 MHz, DMSO*-d6*): δ 8.14-7.12 (m, 13H, Ar-H), 6.03 (d, 8.1 Hz, 1H), 5.54 (d, J = 8.1 Hz, 1H) ppm; 13C NMR (100 MHz, DMSO*-d6*): δ 160.7, 145.8, 143.2, 140.2, 136.2, 135.7, 134.1, 129.4, 128.1, 127.4, 126.8, 125.7, 124.4, 123.0, 122.1, 121.9, 120.5, 101.5, 50.0 ppm; Anal. Calcd for C22H14Cl2N2S: C, 64.55; H, 3.45; N, 6.84; S, 7.83 Found: C, 64.53; H, 3.42; N, 6.83; S, 7.81; HRMS:*m/z* Calculated: 408.0255, Found: 409.0338 [M + H] +

***4-Phenyl-2-(p-tolyl)-2H-benzo[4,5]thiazolo[3,2-a]pyrimidine (5h)***

Yellow solid; 1H NMR (400 MHz, DMSO*-d6*): δ 8.13-7.10 (m, 13H, Ar-H), 6.04 (d, 8.1 Hz, 1H), 5.56 (d, J = 8.1 Hz, 1H), 2.37 (s, 3H, CH3) ppm; 13C NMR (100 MHz, DMSO*-d6*): δ 160.7, 145.7, 143.0, 138.7, 136.7, 133.1, 129.3, 128.3, 127.3, 126.7, 125.4, 124.1, 122.4, 121.9, 119.7, 100.6, 61.8, 21.2 ppm; Anal. Calcd for C23H18N2S: C, 77.93; H, 5.12; N, 7.90; S, 9.05. Found: C, 77.89; H, 5.10; N, 7.89; S, 9.04; HRMS:*m/z* Calculated: 354.1191, Found: 355.1276 [M + H] +

***4-Phenyl-2-(o-tolyl)-2H-benzo[4,5]thiazolo[3,2-a]pyrimidine (5i)***

Yellow solid; 1H NMR(400 MHz, DMSO*-d6*): δ 6.91-8.12 (m, 13H, Ar-H), 6.04 (d, 8.1 Hz, 1H), 5.52 (d, J = 8.1 Hz, 1H), 2.35 (s, 3H, CH3) ppm; 13C NMR (100 MHz, DMSO*-d6*): δ 160.7, 145.6, 143.4, 138.5, 136.9, 134.1, 131.4, 130.0, 129.8, 128.6, 127.3, 126.3, 125.5, 124.9, 122.8, 121.4, 119.1, 101.8, 60.0, 20.0 ppm; Anal. Calcd for C23H18N2S: C, 77.93; H, 5.12; N, 7.90; S, 9.05. Found: C, 77.89; H, 5.10; N, 7.89; S, 9.04; HRMS:*m/z* Calculated: 354.1191, Found: 355.1276 [M + H] +

***4-Phenyl-2-(3,4,5-trimethoxyphenyl)-2H-benzo[4,5]thiazolo[3,2-a]-pyrimidine (5j)***

Yellow solid; 1H NMR (400 MHz, DMSO*-d6*): δ 8.12-7.12 (m, 9H, Ar-H) 6.52 (s, 2H), 6.03 (d, 8.1 Hz, 1H), 5.54 (d, J = 8.1 Hz, 1H), 3.81 (s, 9H, 3-OCH3) ppm; 13C NMR (100 MHz, DMSO*-d6*): δ 160.8, 151.5, 145.2, 143.8, 136.5, 133.8, 129.5, 128.8, 127.5, 126.4, 124.1, 122.3, 121.8, 119.4, 105.5, 100.9, 61.7, 60.8, 55.7 ppm; Anal. Calcd for C25H22N2O3S: C, 69.75; H, 5.15; N, 6.51; S, 7.45; Found: C, 69.73; H, 5.12; N, 6.49; S, 7.43; HRMS:*m/z* Calculated: 430.1351, Found: 431.1436 [M + H] +

**Supporting Information:**

**Contents**

1H NMR and 13C NMR spectra of 4a……………….......................................16

1H NMR and 13C NMR spectra of 4b……………….......................................17

1H NMR and 13C NMR spectra of 4c………………...................................... 18

1H NMR and 13C NMR spectra of 4d………………………………………… 19

1H NMR and 13C NMR spectra of 4e……………………………………….....20

1H NMR and 13C NMR spectra of 4f………………………………………... 21

1H NMR and 13C NMR spectra of 4g……………………………………….. 22

1H NMR and 13C NMR spectra of 4h………………………………………... 23

1H NMR and 13C NMR spectra of 4i………………………………………… 24

HRMS spectra of 4i……………………………………………………………...25

1H NMR 13C NMR spectra of 4j………………………………………………. 25-26

1H NMR and 13C NMR spectra of 5a………………………………………… 27-28

HRMS spectra of 5a……………………………………………………………...28

1H NMR and 13C NMR spectra of 5b…………………………………………. 28-29

HRMS spectra of 5b……………………………………………………………...29

1H NMR and 13C NMR spectra of 5c………………………………………… 29-30

HRMS spectra of 5c……………………………………………………………...30

1H NMR and 13C NMR spectra of 5d……………………………………………. 31

HRMS spectra of 5d……………………………………………………………...32

1H NMR and 13C NMR spectra of 5e…………………………………………… 32-33

HRMS spectra of 5e……………………………………………………………...33

1H NMR and 13C NMR spectra of 5f…………………………………………… 34

HRMS spectra of 5f……………………………………………………………...35

1H NMR and 13C NMR spectra of 5g……………………………………………. 35-36

HRMS spectra of 5g……………………………………………………………...36

1H NMR and 13C NMR spectra of 5h…………………………………………….. 37

HRMS spectra of 5h……………………………………………………………...38

1H NMR and 13C NMR spectra of 5i………………………………………………38-39

HRMS spectra of 5i……………………………………………………………...39

1H NMR and 13C NMR spectra of 5j……………………………………………….40

HRMS spectra of 5j……………………………………………………………...40


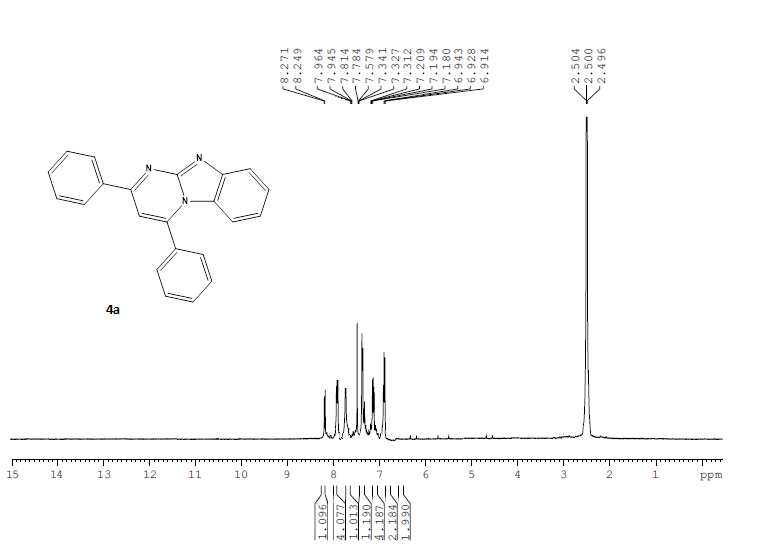


**1H NMR spectra of 4a**


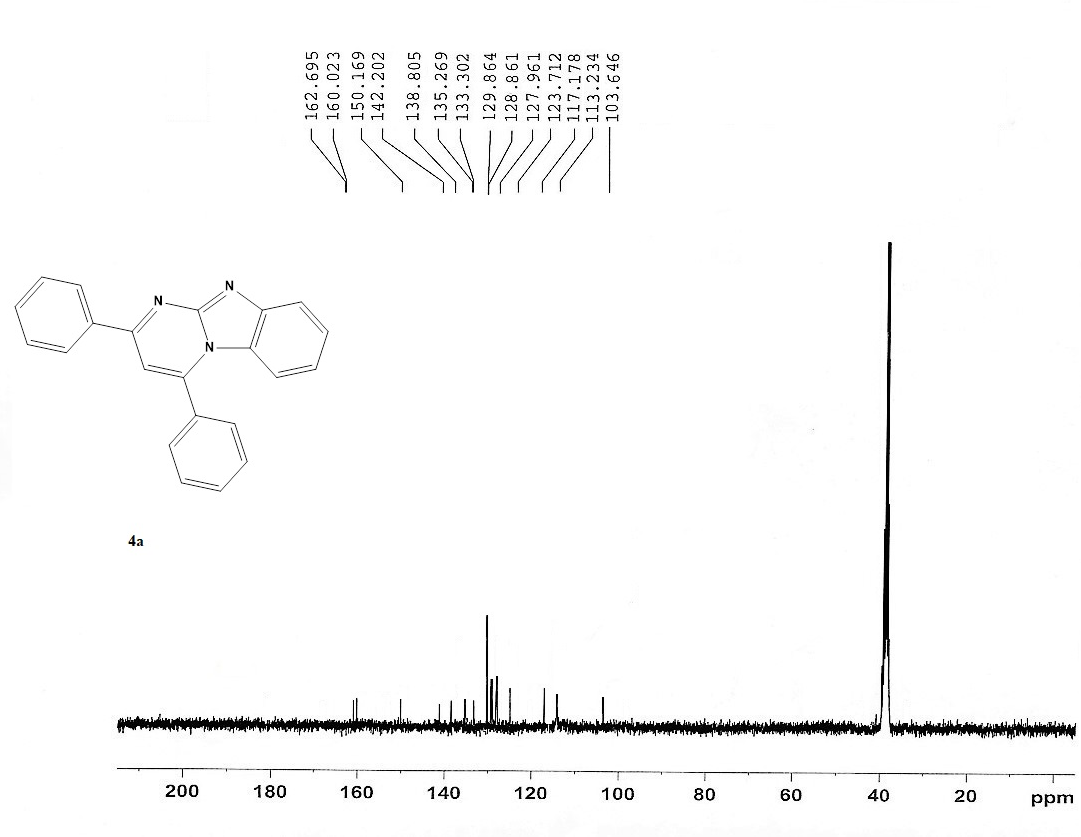


**13C NMR spectra of 4a**


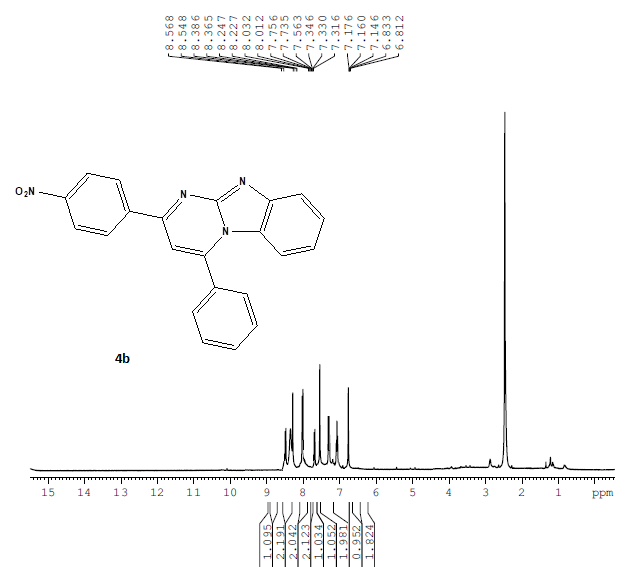


**1H NMR spectra of 4b**

**
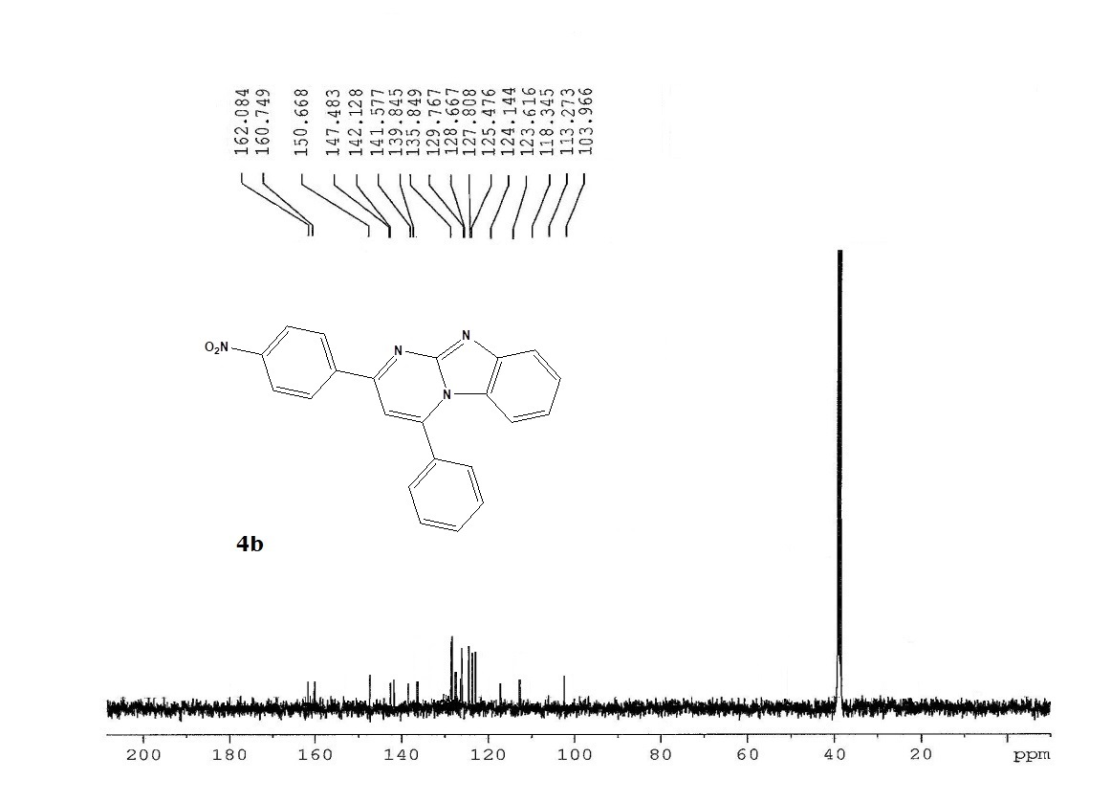
**

**13C NMR spectra of 4b**

**
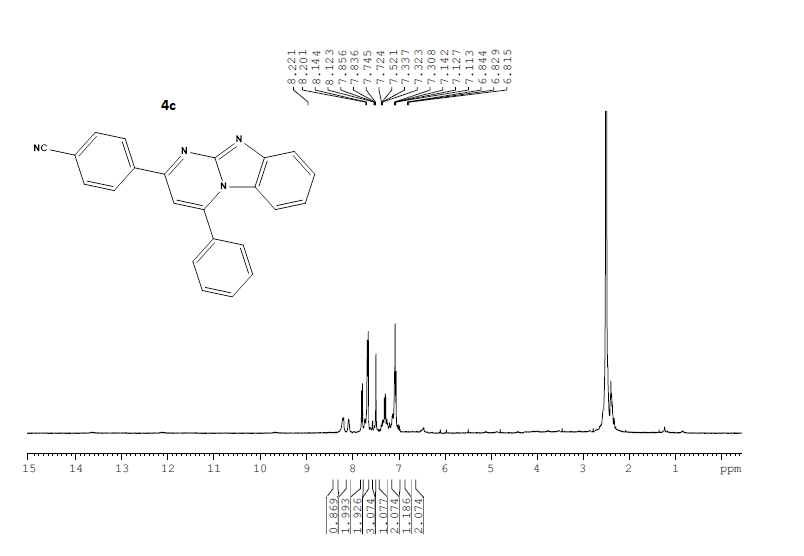
**

**1H NMR spectra of 4c**

**
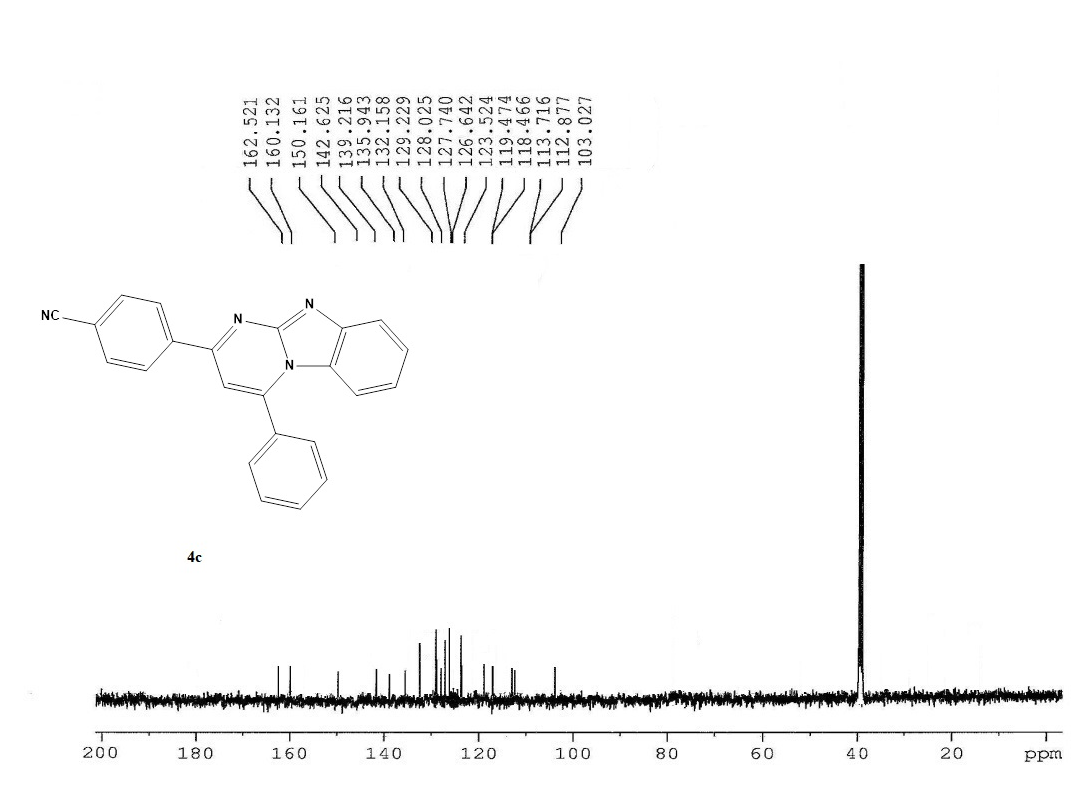
**

**13C NMR spectra of 4c**

**
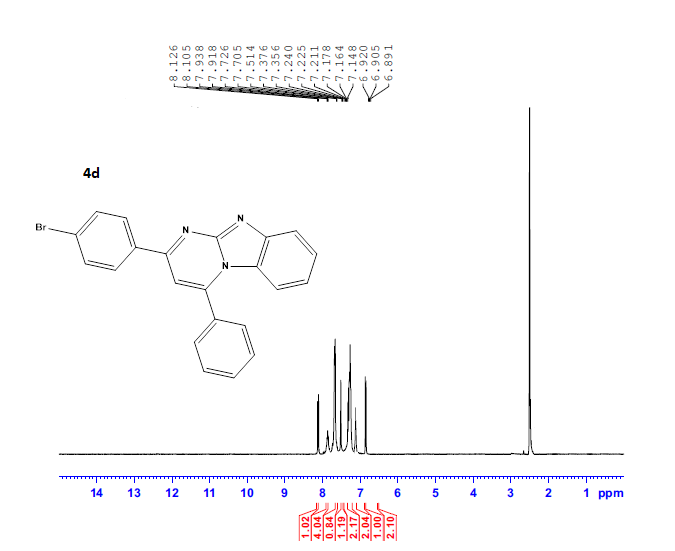
**

**1H NMR spectra of 4d**

**
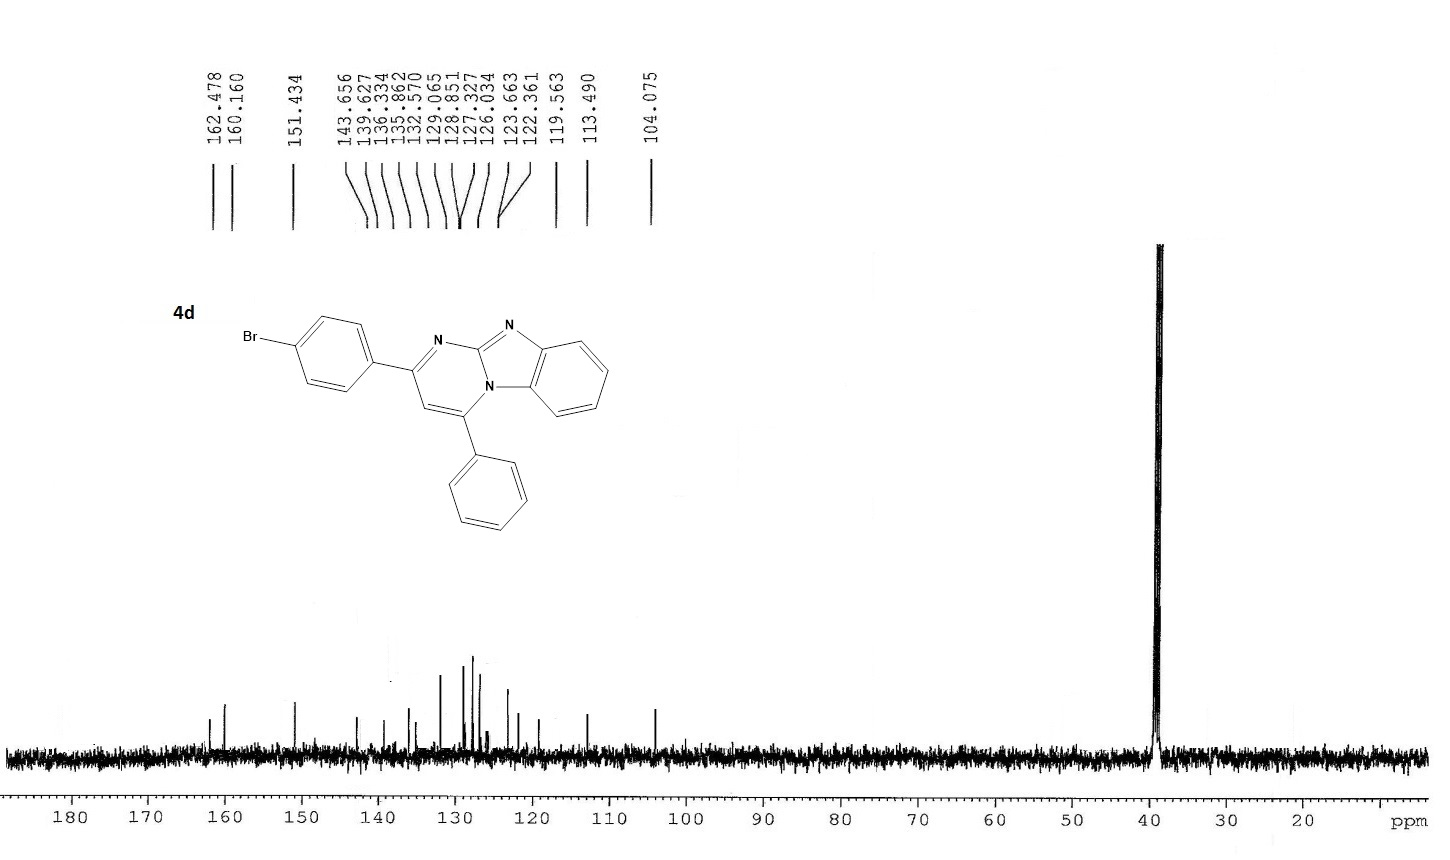
**

**13C NMR spectra of 4d**

**
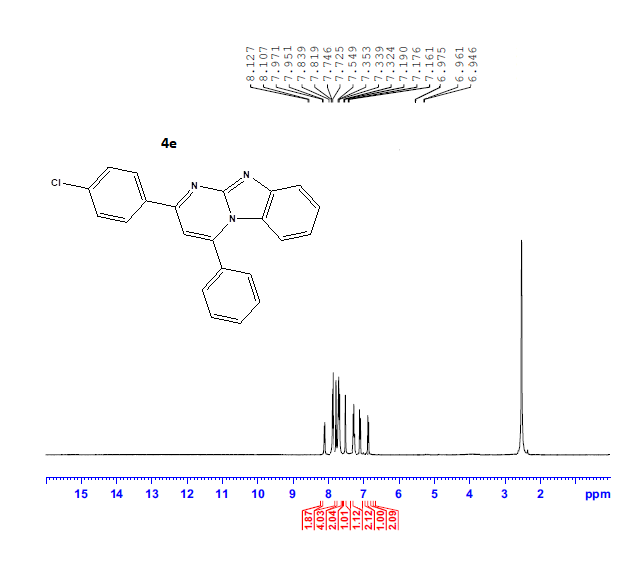
**

**1H NMR spectra of 4e
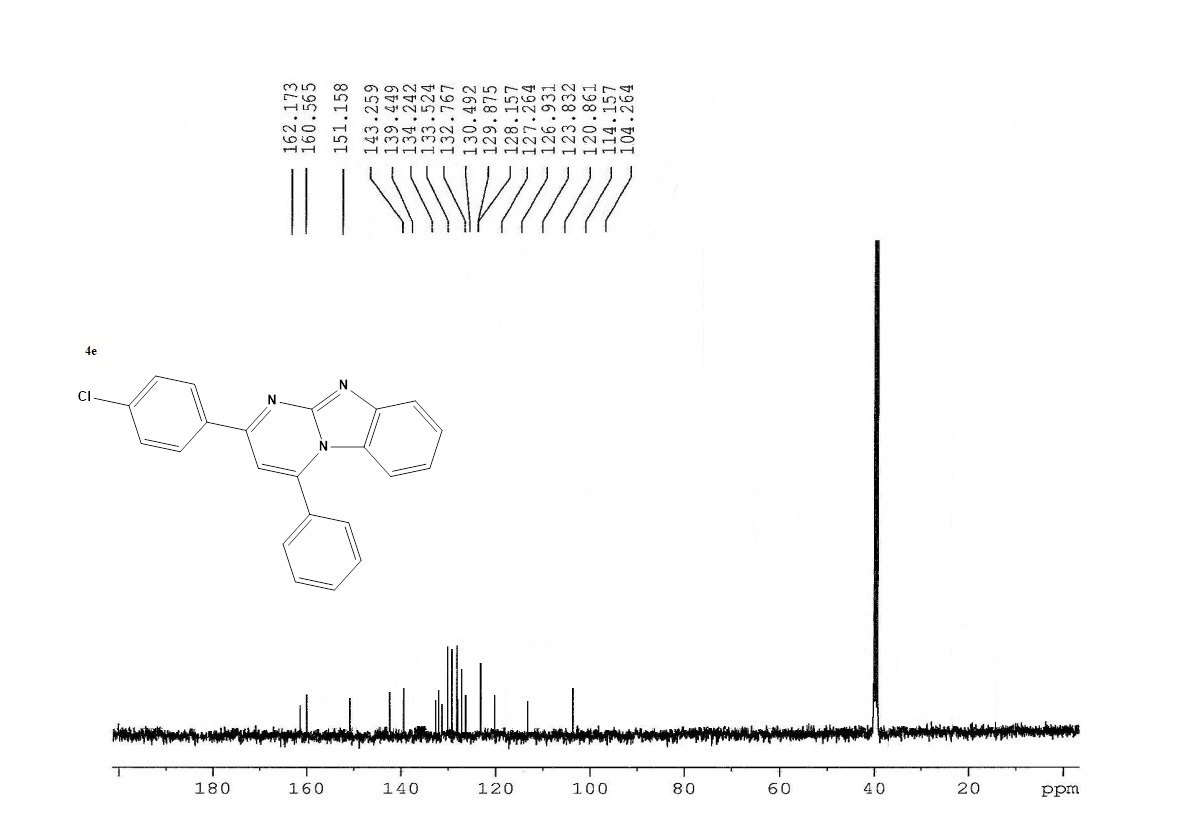
**

**13C NMR spectra of 4e**

**
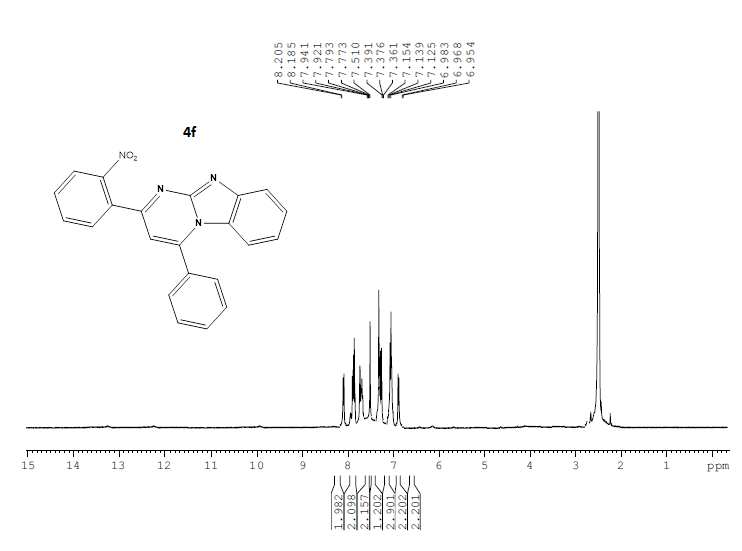
**

**1H NMR spectra of 4f**

**
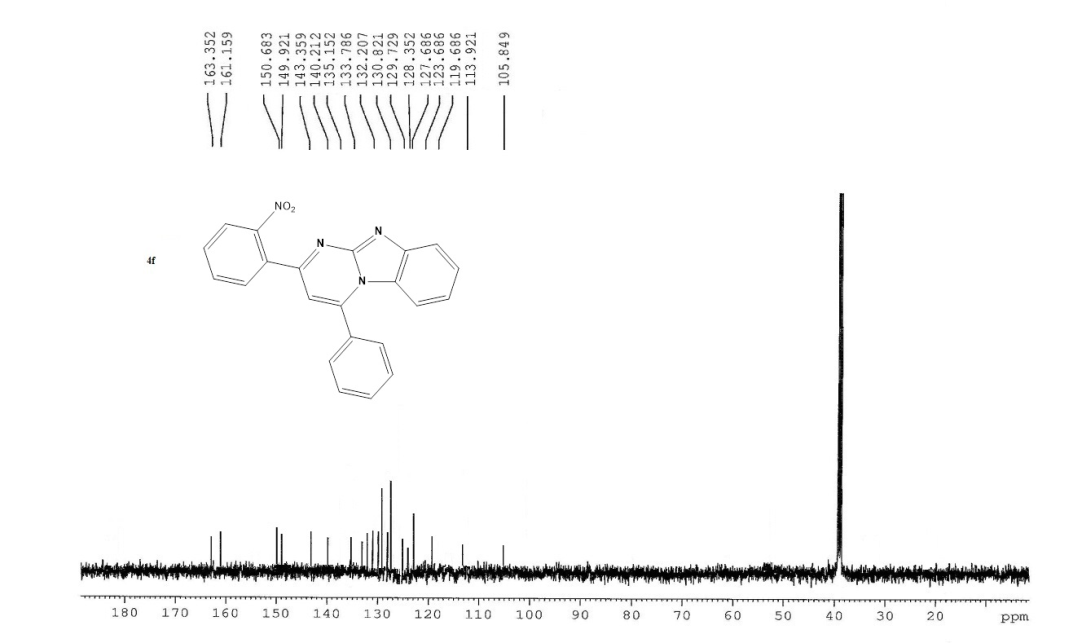
**

**13C NMR spectra of 4f**


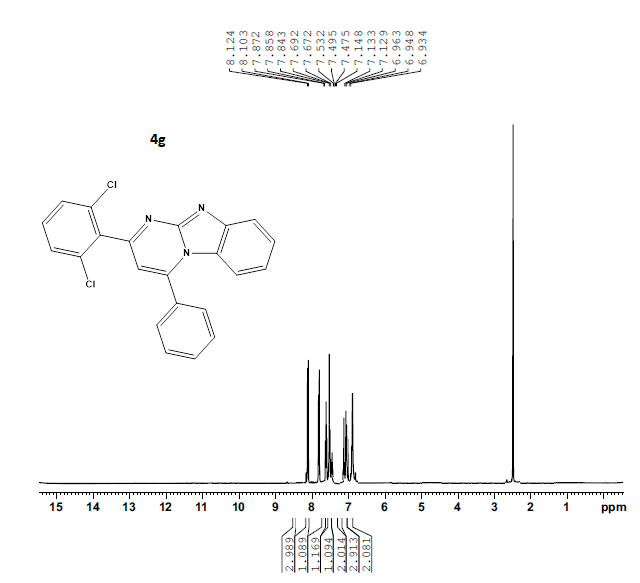


**1H NMR spectra of 4g**


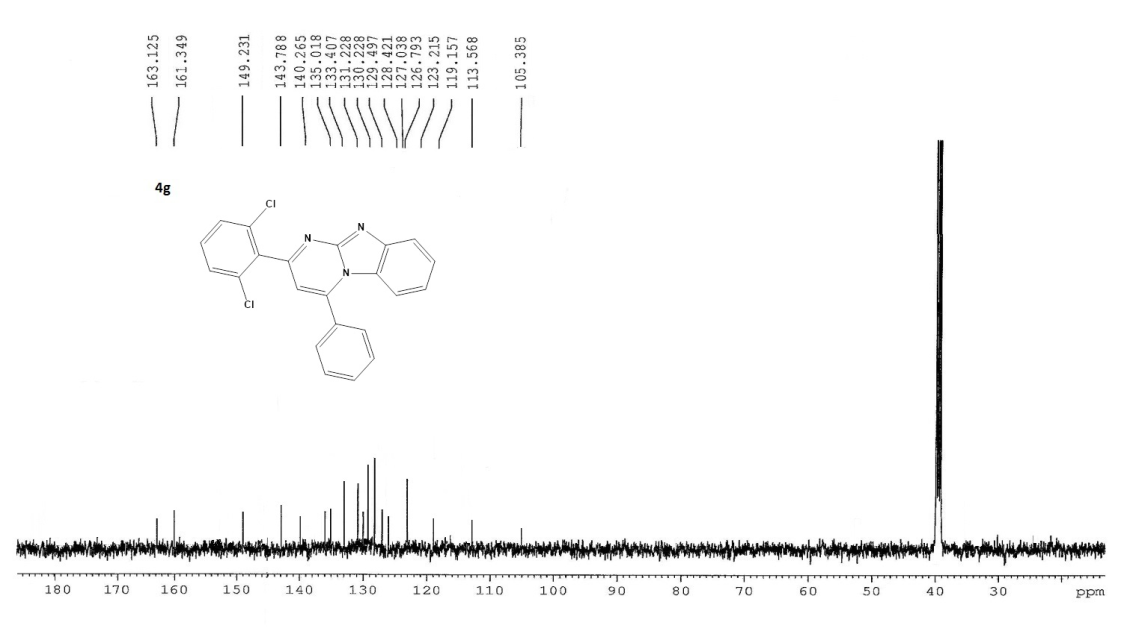


**13C NMR spectra of 4g**


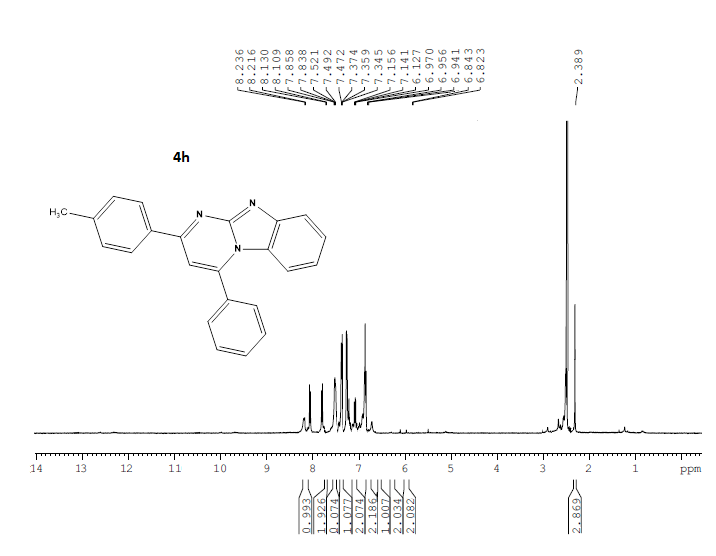


**1H NMR spectra of 4h**


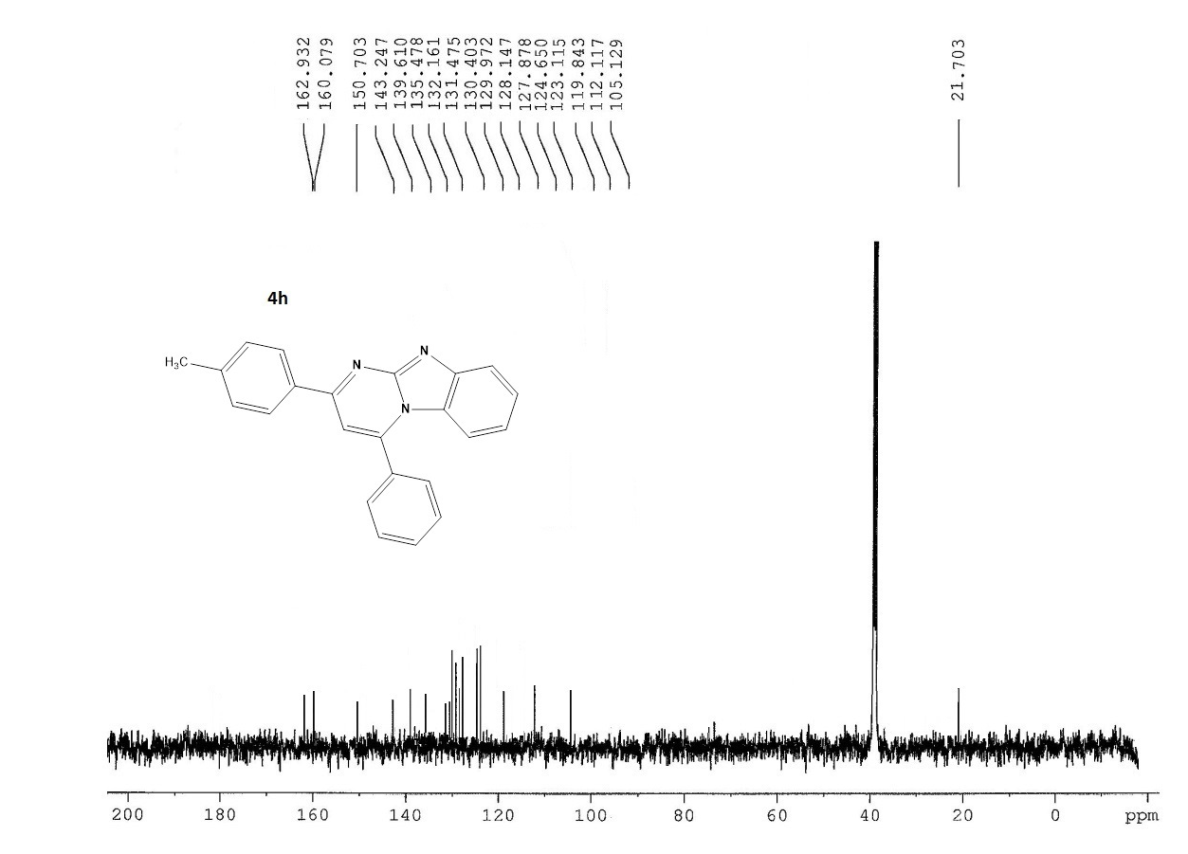


**13C NMR spectra of 4h**


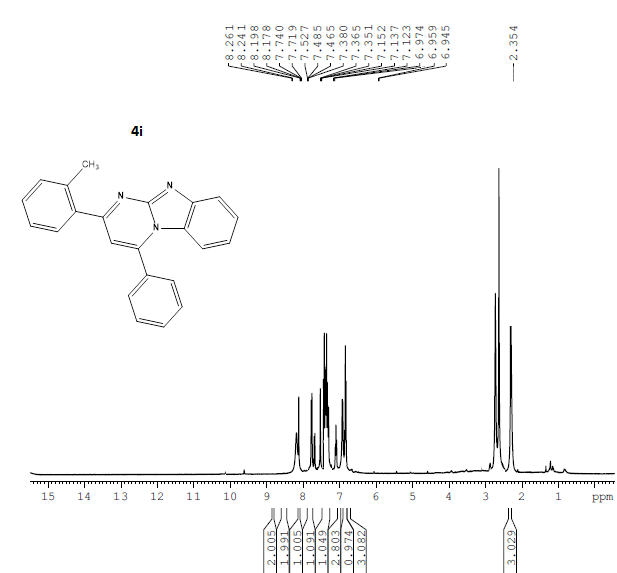


**1H NMR spectra of 4i**


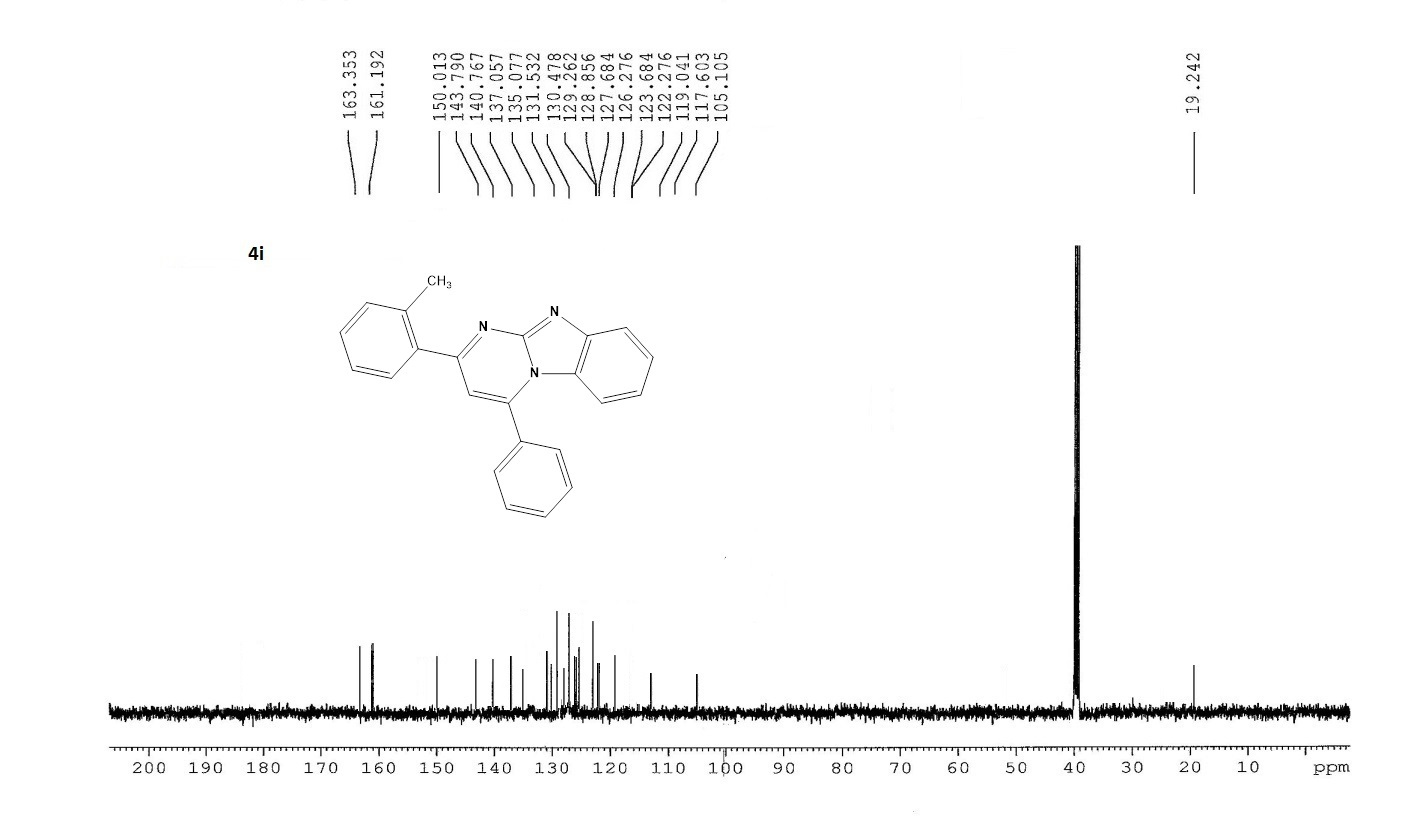


**13C NMR spectra of 4i**


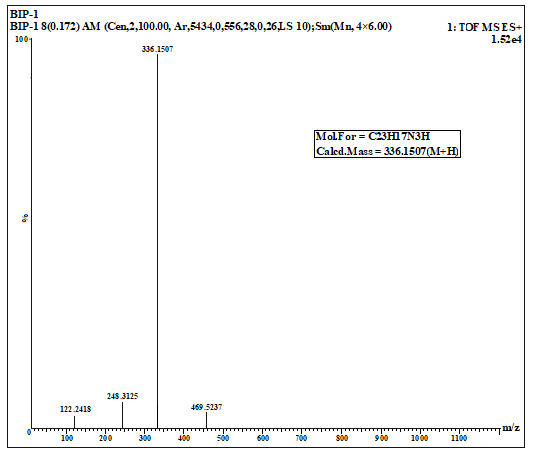


**HRMS spectra of 4i**

**
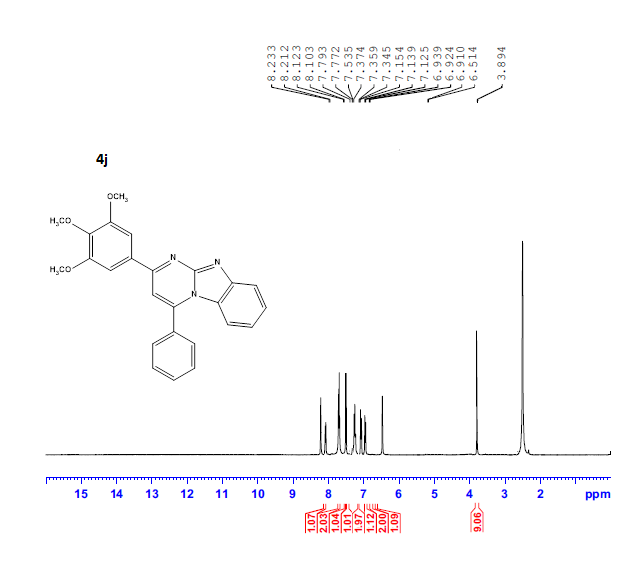
**

**1H NMR spectra of 4j**


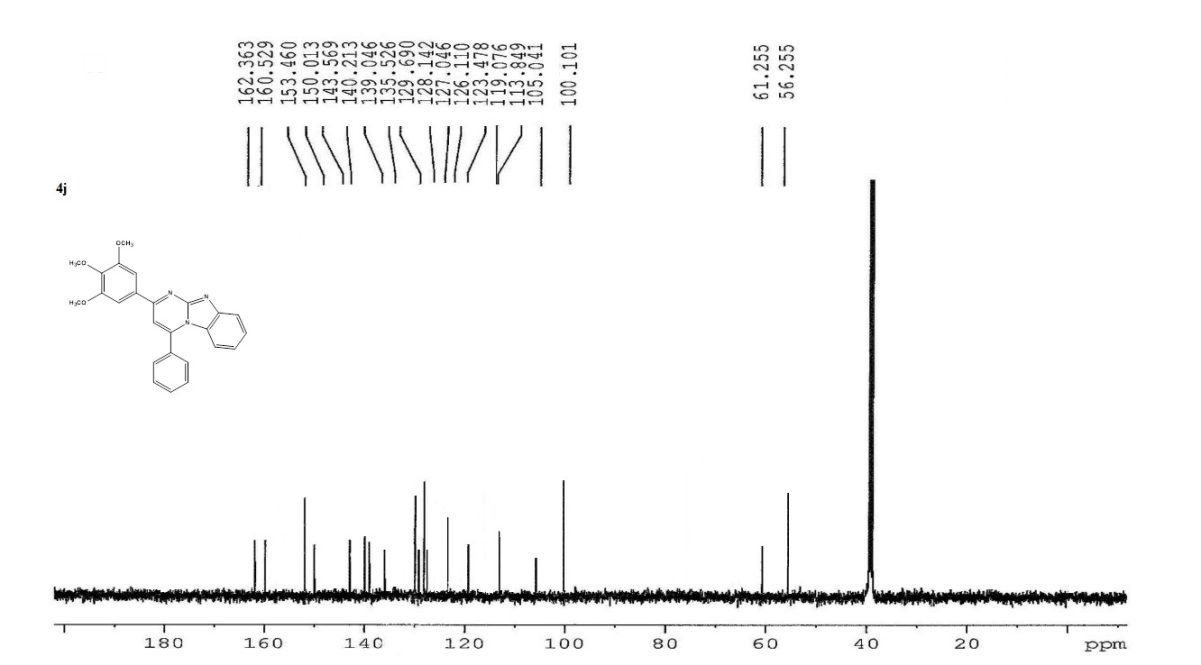


**13C NMR spectra of 4j**


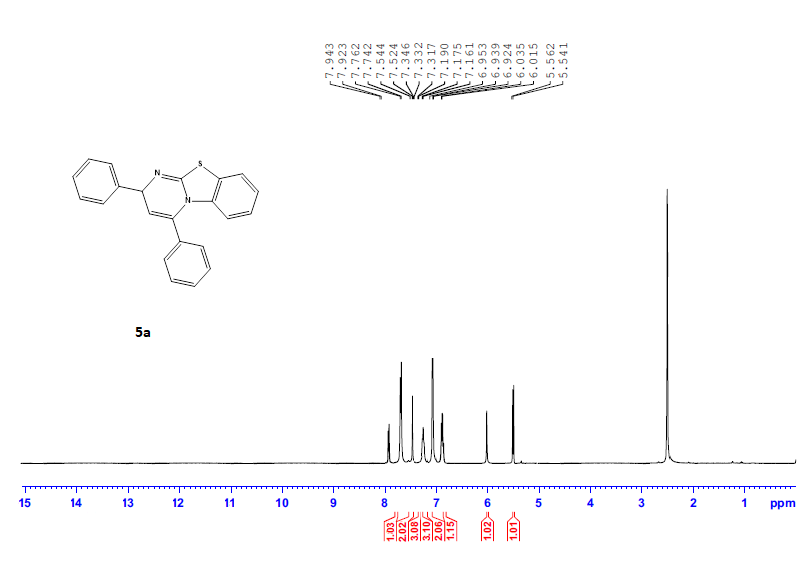


**1H NMR spectra of 5a**


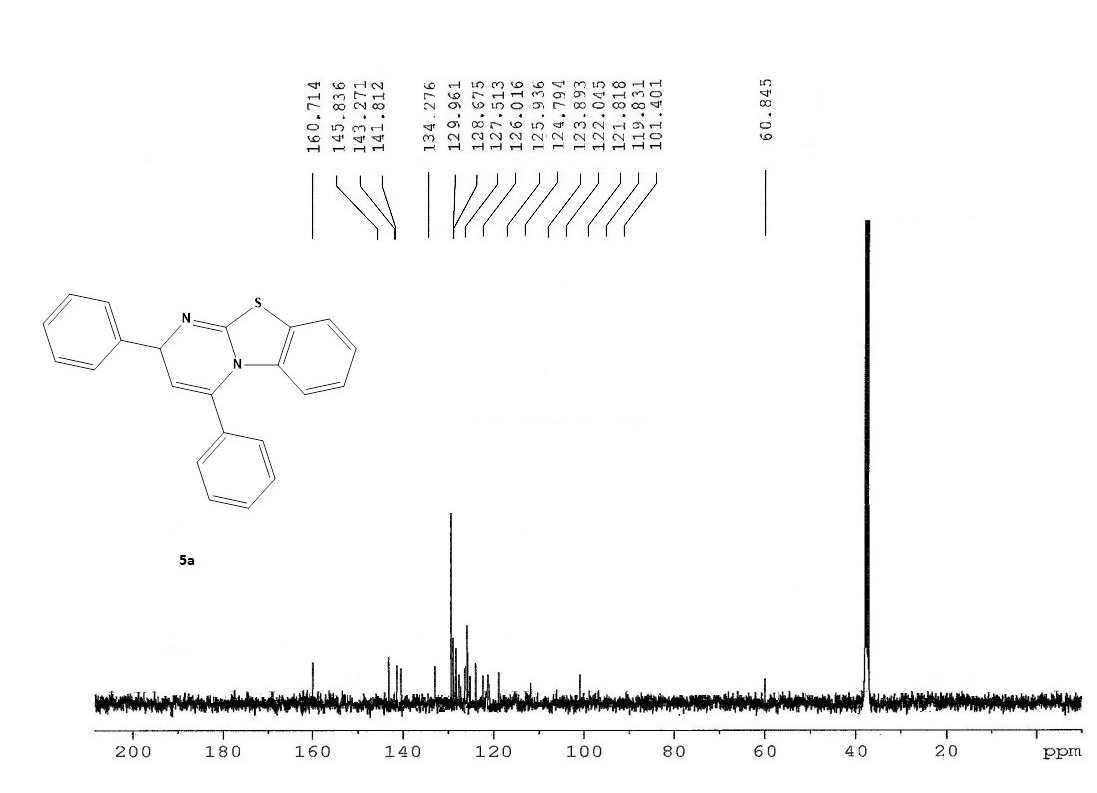


**13C NMR spectra of 5a**


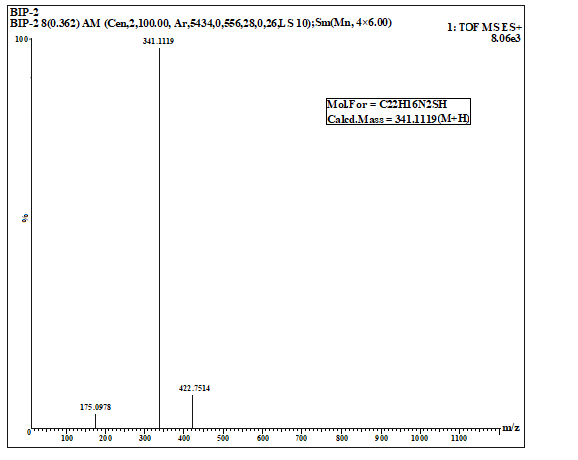


HRMS spectra of 5a


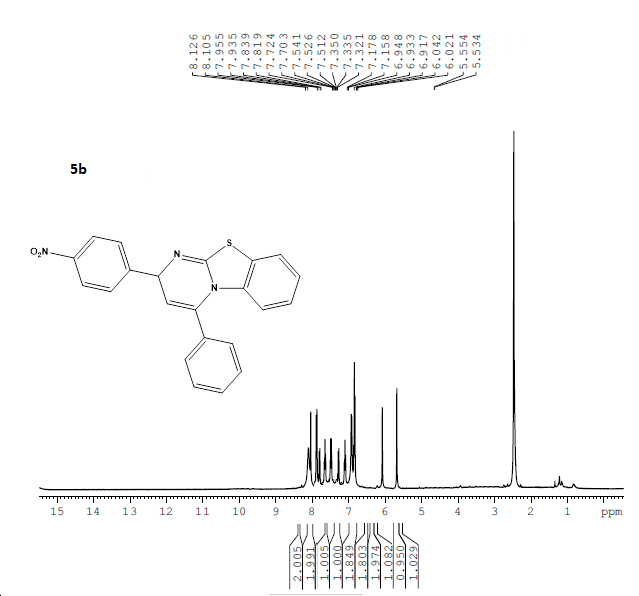


**1H NMR spectra of 5b**

**
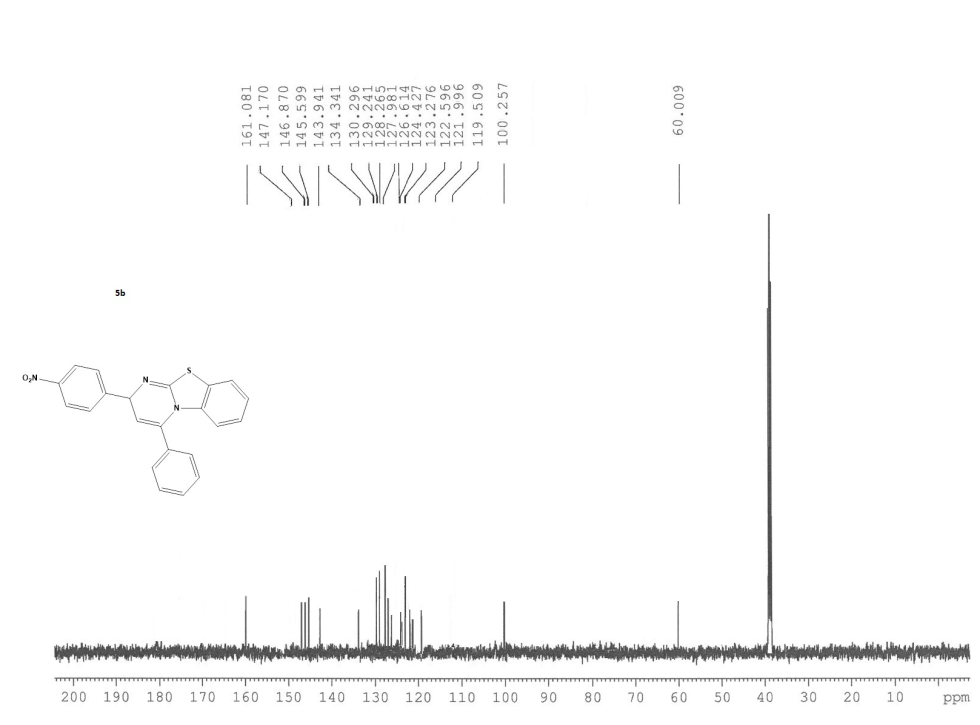
**

**13C NMR spectra of 5b**


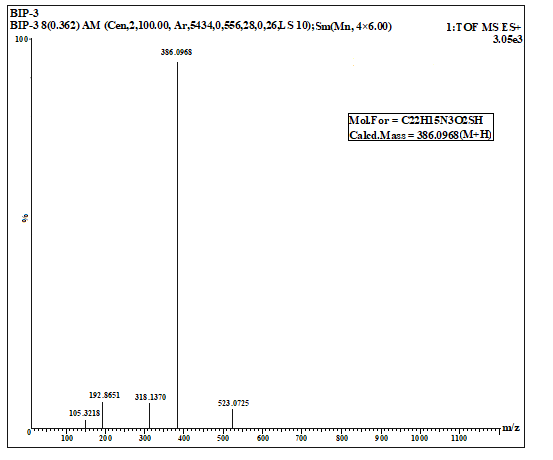


HRMS spectra of 5b


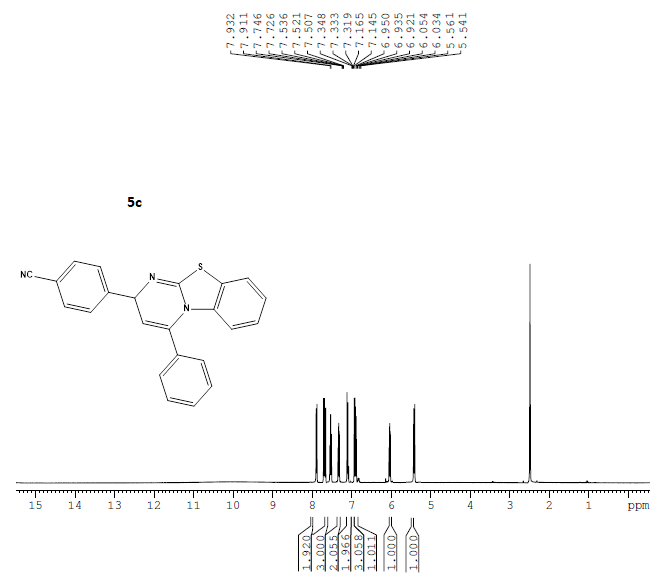


**1H NMR spectra of 5c**


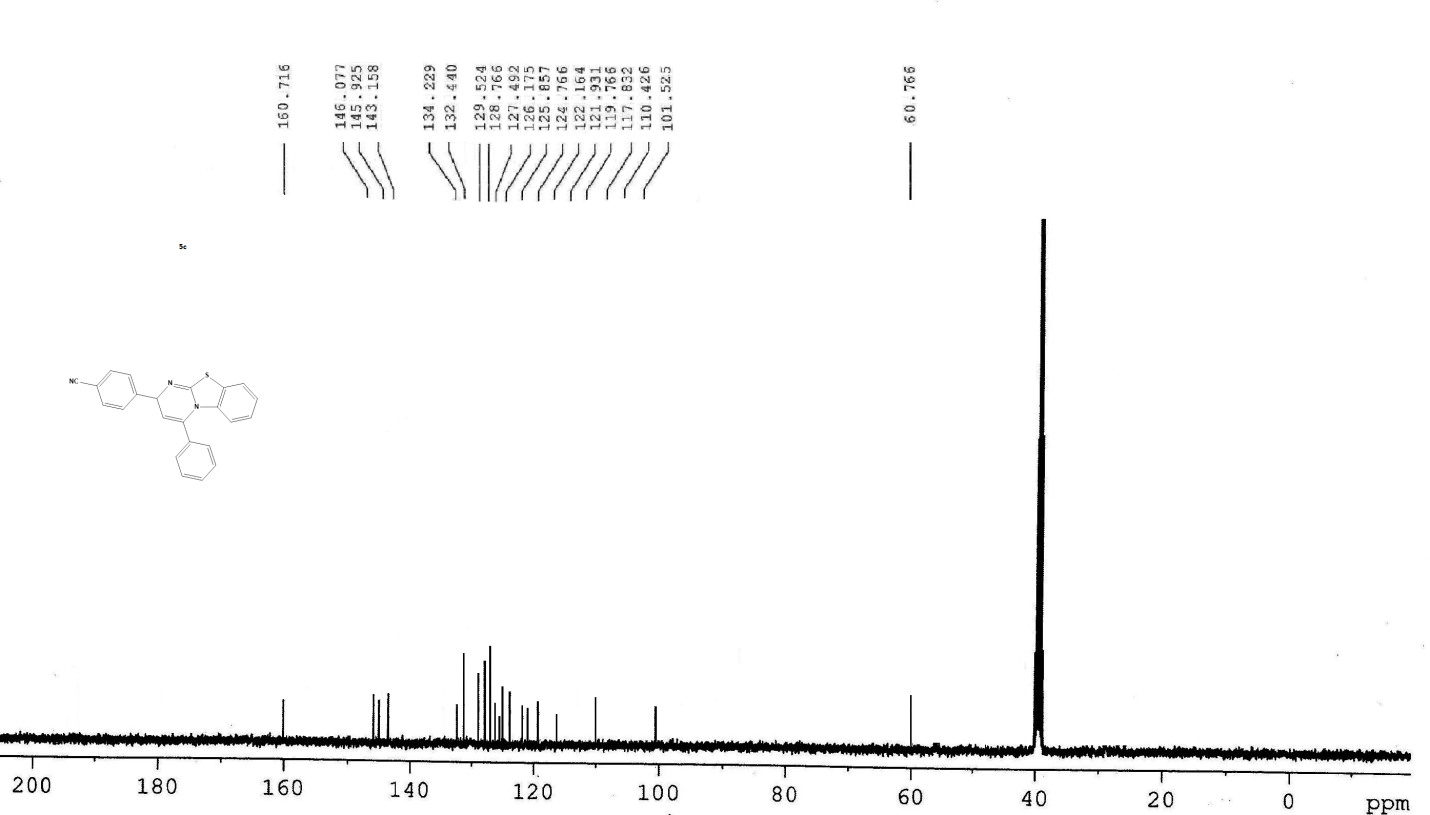


**13C NMR spectra of 5c**


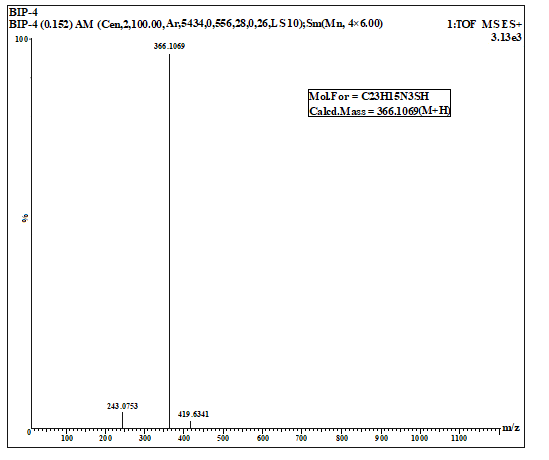


HRMS spectra of 5c


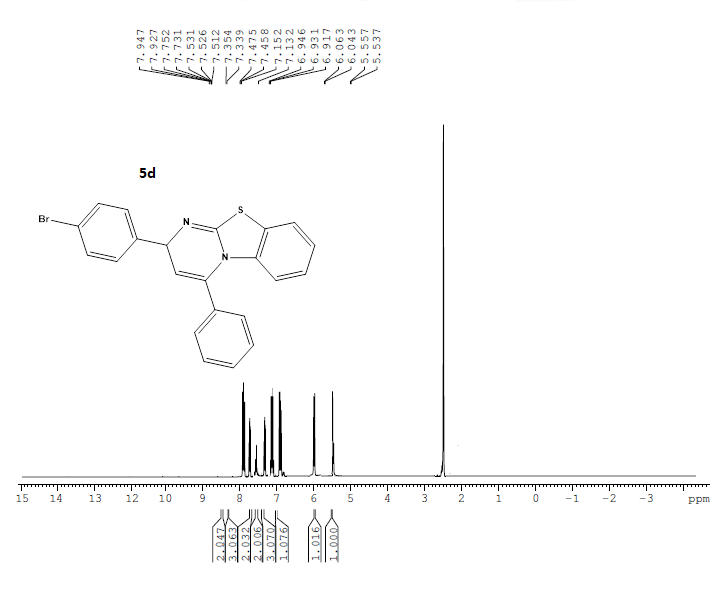


**1H NMR spectra of 5d**


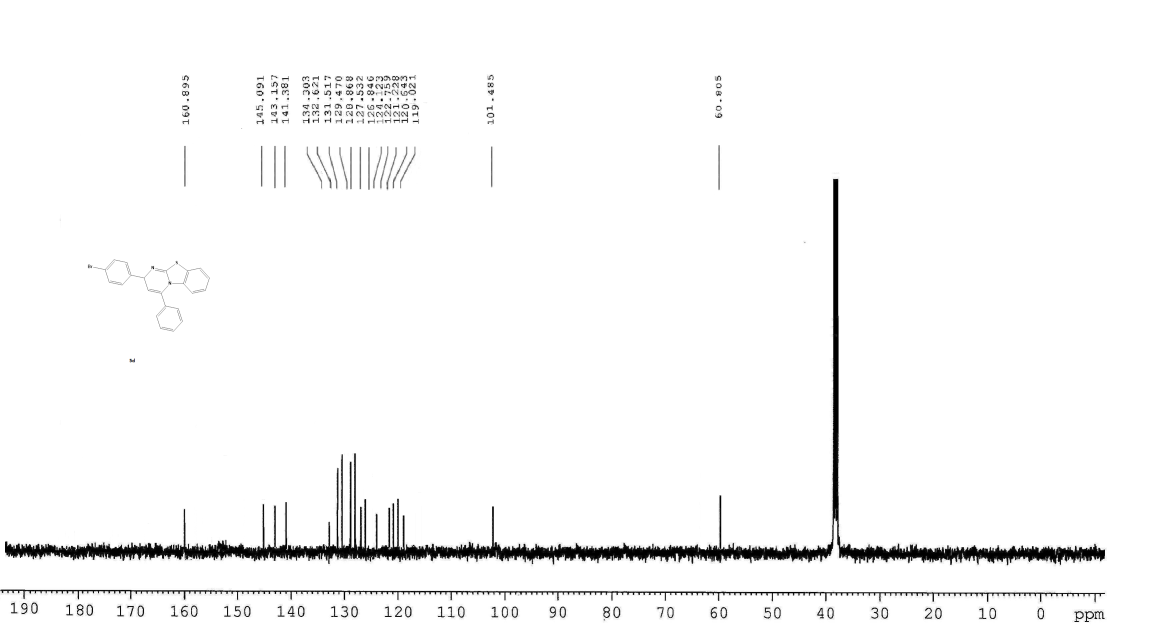


**13C NMR spectra of 5d**


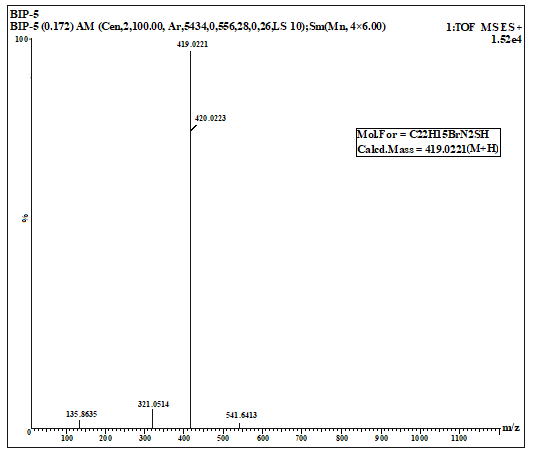


HRMS spectra of 5d


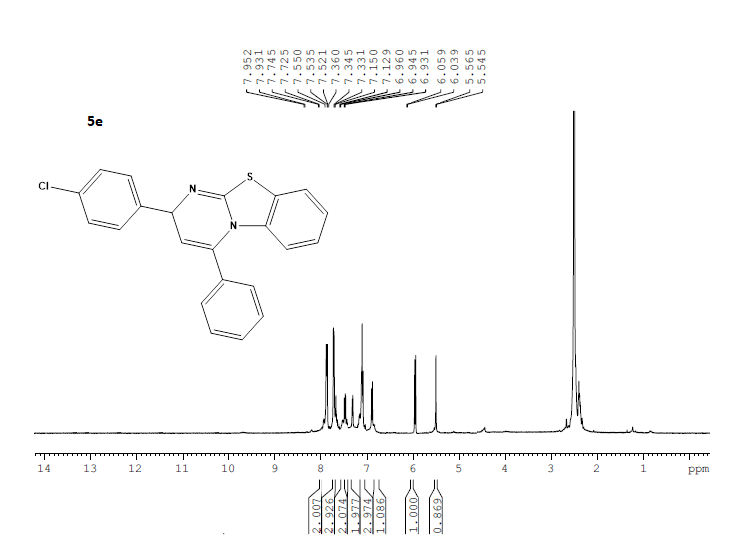


**1H NMR spectra of 5e**


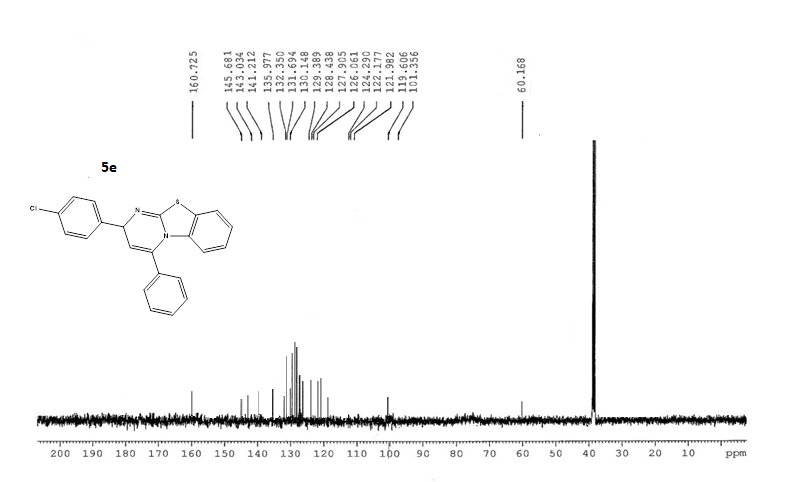


**13C NMR spectra of 5e**

**
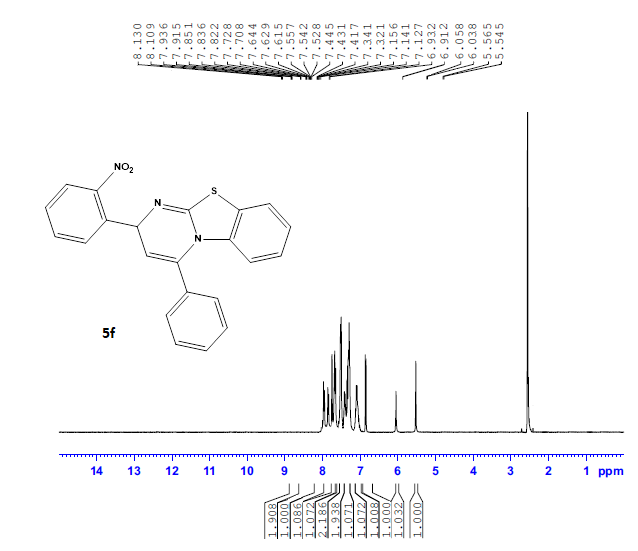
**

**1H NMR spectra of 5f**

**
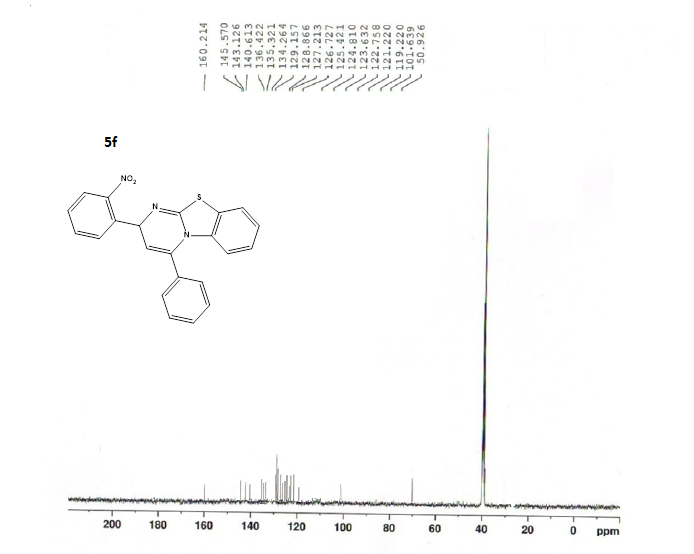
**

**13C NMR spectra of 5f**

**
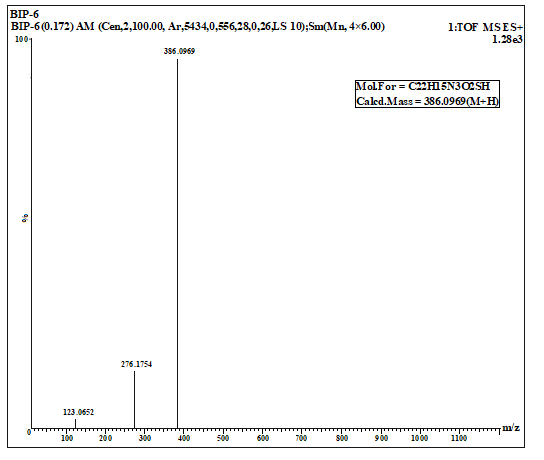
**

HRMS spectra of 5f

**
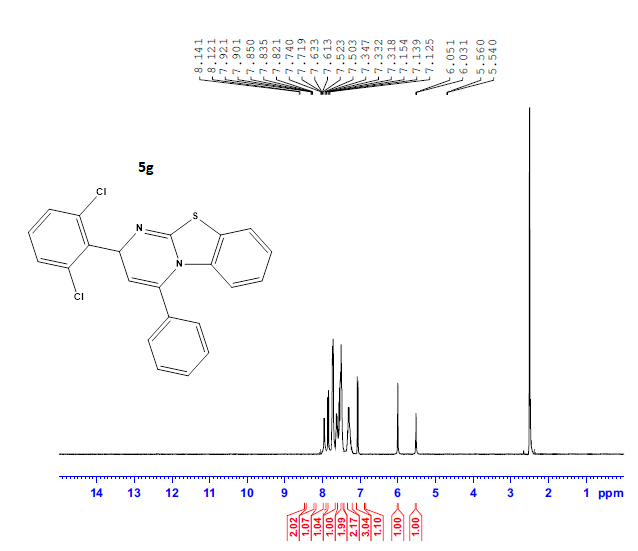
**

**1H NMR spectra of 5g**


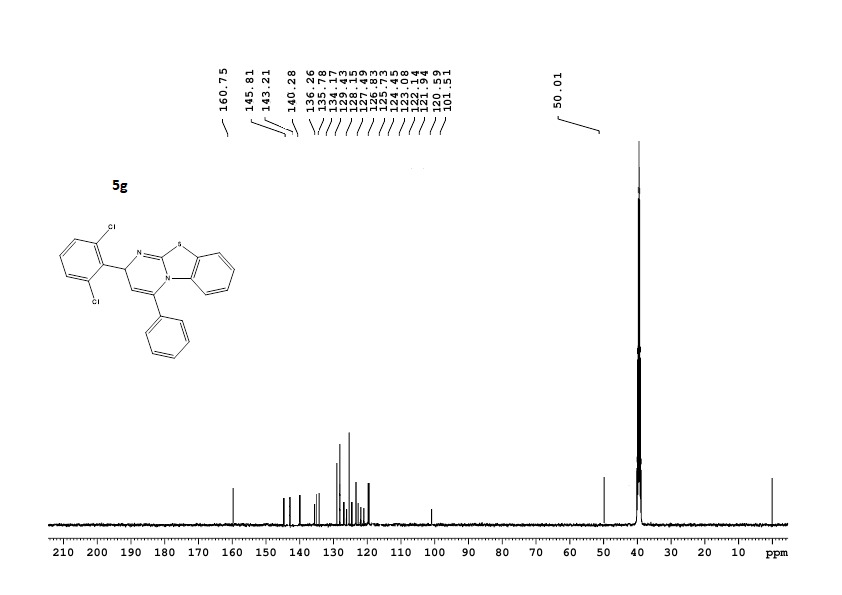


**13C NMR spectra of 5g**

**
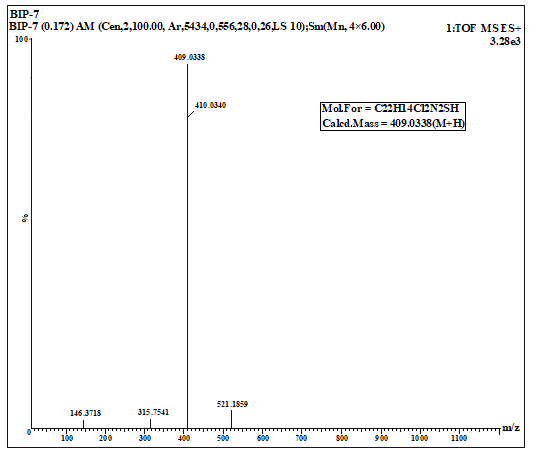
**

HRMS spectra of 5g

**
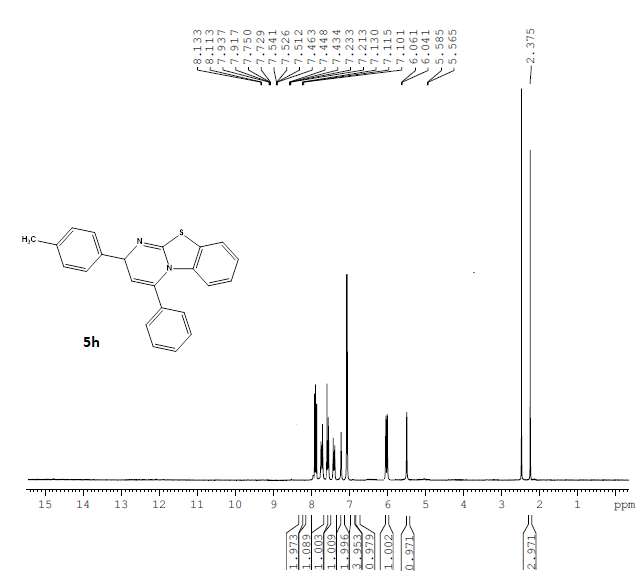
**

**1H NMR spectra of 5h**

**
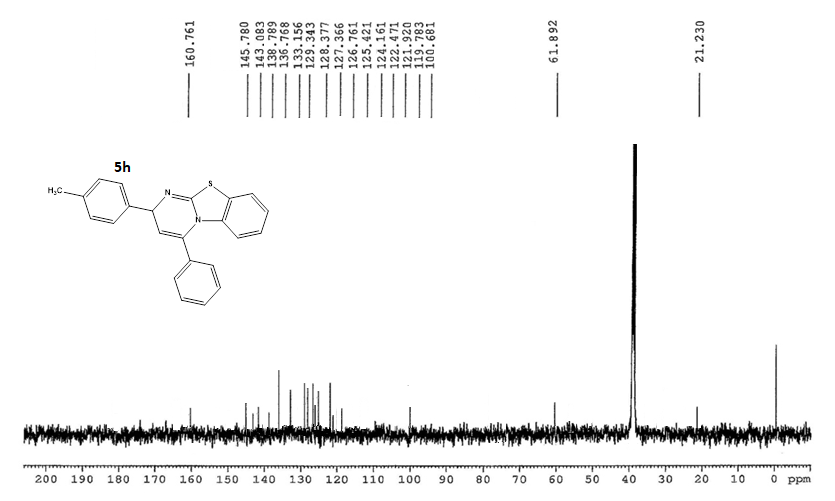
**

**13C NMR spectra of 5h**

**
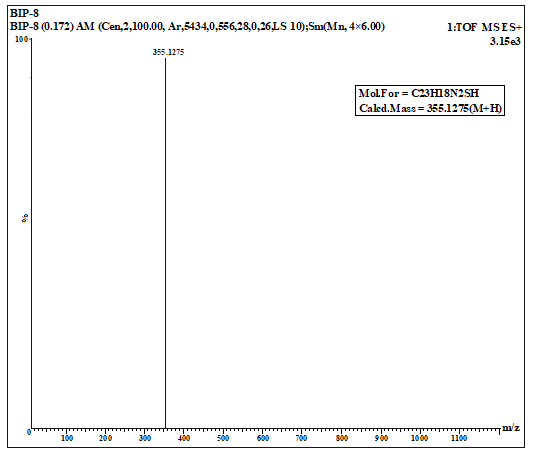
**

HRMS spectra of 5h

**
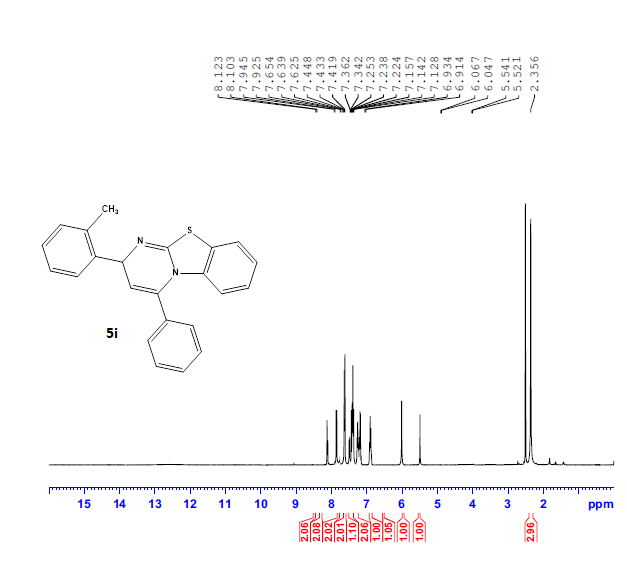
**

**1H NMR spectra of 5i**

**
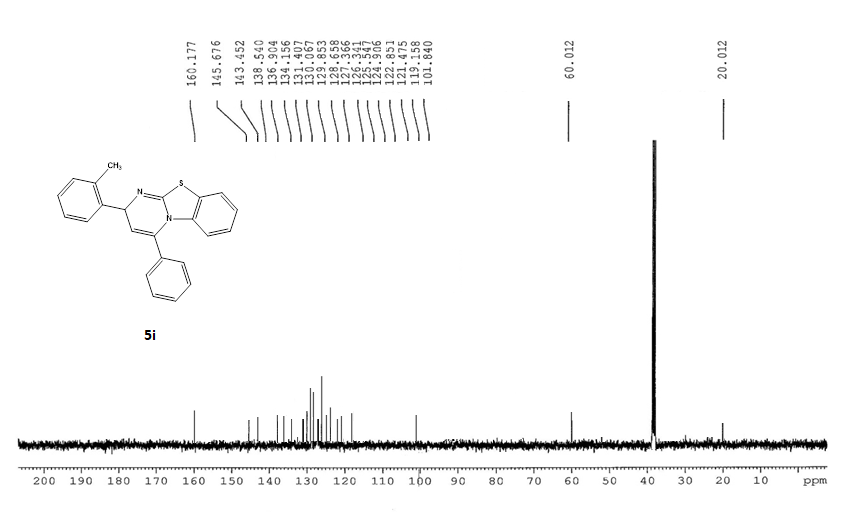
**

**13C NMR spectra of 5i**


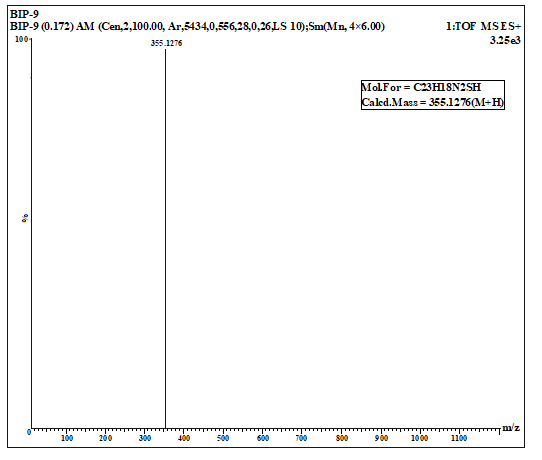


HRMS spectra of 5i

**
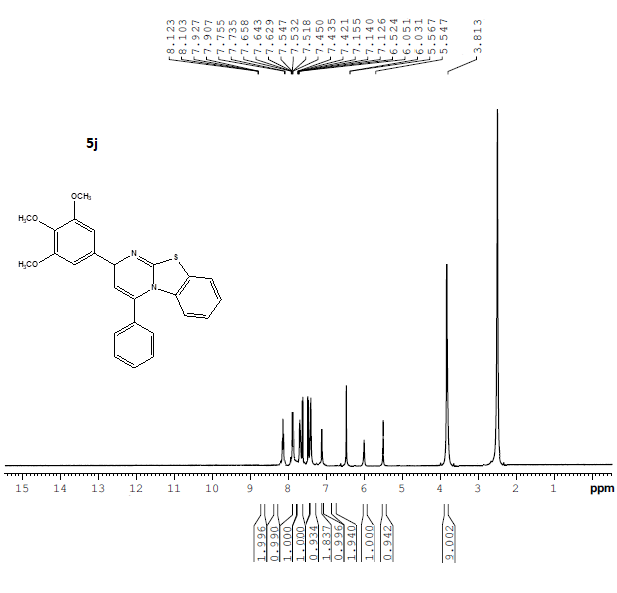
**

**1H NMR spectra of 5j**


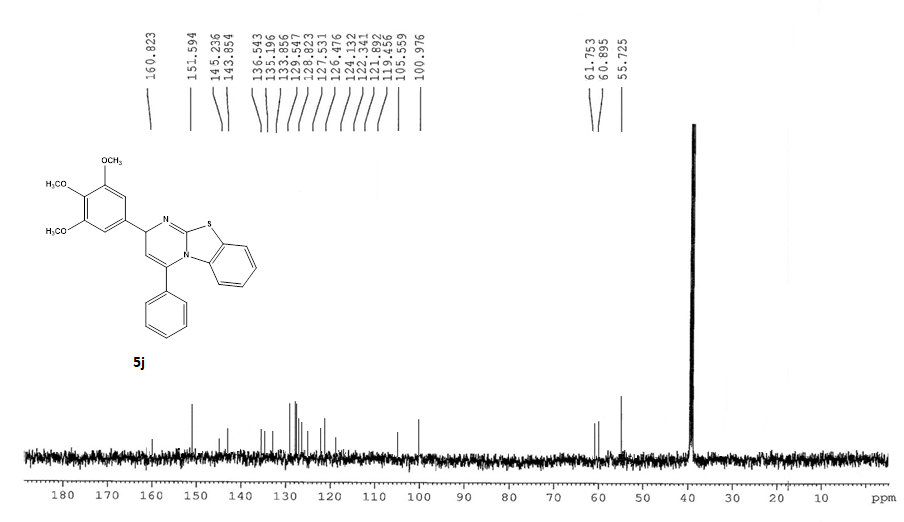


**13C NMR spectra of 5j**


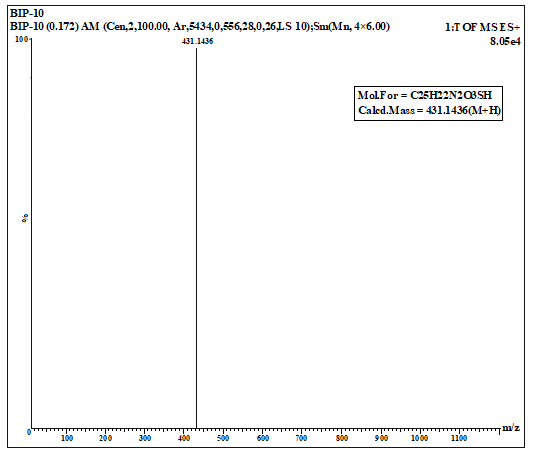


HRMS spectra of 5j
